# Supplementary material for: The CHROMEVALOA Database: A Resource for the Evaluation of Okadaic Acid Contamination in the Marine Environment Based on the Chromatin-Associated Transcriptome of the Mussel Mytilus galloprovincialis
Source: Mar Drugs. 2013 Mar 12;11(3):830–41. doi: 10.3390/md11030830 (PMC3705373; doi:10.3390/md11030830)
Supplement: Supplementary File 1 — Supplementary Materials (PDF, 526 KB) [file marinedrugs-11-00830-s001.pdf]

## Supplementary Materials

**Figure S1.** List of keywords used to identify chromatin-associated transcripts in the assembled OA-specific transcriptome from *M. galloprovincialis*. **2**

**Figure S2.** Script used to implement a keyword-based routine for the identification of chromatin-associated transcripts among sequence descriptions and related ontology terms. **3**

**Figure S3.** Differential expression analysis results displaying unigenes with False Discovery Rate (FDR) < 0.1. **4**

**Figure S4.** Gene Ontology (GO) terms with highest significance levels (Fisher's exact test) in (A) upregulated and (B) downregulated unigenes. **33**

**Figure S1.** List of keywords used to identify chromatin-associated transcripts in the assembled OA-specific transcriptome from *M. galloprovincialis*.

|                                 |
|---------------------------------|
| Acf                             |
| Centromere                      |
| Chd                             |
| Chrac                           |
| Chromatin                       |
| Dna binding                     |
| Dna damage                      |
| Dna repair                      |
| Double strand break             |
| Epigenetic                      |
| High mobility group             |
| Histone                         |
| Hmg-a,b,n                       |
| Ino80                           |
| Mi-2                            |
| Nucleosome                      |
| Nurf                            |
| Post translational modification |
| Protamine                       |
| Rsc                             |
| Rsf                             |
| Saga                            |
| Swi/snf                         |

**Figure S2.** Script used to implement a keyword-based routine for the identification of chromatin-associated transcripts among sequence descriptions and related ontology terms.

```
#!/usr/bin/perl -w

#Victoria Suárez-Ulloa
#Selection of annotated sequences by keyword match

use strict;

print "Insert input file name:\n";
my $inputfile = <STDIN>;
chomp $inputfile;

print "Insert name for the output file:\n";
my $outputfile = <STDIN>;
chomp $outputfile;

open(DATA, $inputfile) || die "ERROR opening input file\n";
my @todo = <DATA>;
close(DATA);

my @selected;
my $i;

foreach my $k (@todo){
    if ($k =~ m/protamine|histone|chromatin|swi\Wsnf|ino80|chd\W|mi-
2|centromere|dna\Wdamage|dna\Wrepair|dna\Wbinding|double\Wstran
d\Wbreak|high\Wmobility\Wgroup|hmg[a,b,n]|nucleosom|epigenetic|
post\Wtranslational\Wmodification|saga\W|rsc\W|nurf\W|chrac\W|a
cf\W|rsf\W/i) {
        push (@selected,$k);
    }
}

open(DATAOUT, ">$outputfile") || die "ERROR generating outfile\n";
print DATAOUT @selected;
close DATAOUT;

exit;
```

**Figure S3.** Differential expression analysis results displaying unigenes with False Discovery Rate (FDR) < 0.1.

| unigenes     | logFC     | logCPM   | LR       | P-Value | FDR     |
|--------------|-----------|----------|----------|---------|---------|
| XP_002587564 | -10.25158 | 11.62690 | 19.27328 | 0.00001 | 0.03494 |
| CAD79340     | -10.10697 | 11.48231 | 18.91439 | 0.00001 | 0.03494 |
| XP_786549    | -9.97335  | 11.34872 | 18.58287 | 0.00002 | 0.03494 |
| CBN81883     | -9.92006  | 11.29544 | 18.45067 | 0.00002 | 0.03494 |
| XP_615721    | -9.91270  | 11.28809 | 18.43243 | 0.00002 | 0.03494 |
| XP_002738701 | -9.89490  | 11.27028 | 18.38826 | 0.00002 | 0.03494 |
| XP_002115324 | -9.52408  | 10.89956 | 17.46895 | 0.00003 | 0.03649 |
| XP_003460288 | -9.47698  | 10.85247 | 17.35226 | 0.00003 | 0.03649 |
| XP_002737341 | -9.43652  | 10.81202 | 17.25203 | 0.00003 | 0.03649 |
| XP_003417531 | -9.31457  | 10.69011 | 16.95000 | 0.00004 | 0.03649 |
| XP_003373959 | -9.28753  | 10.66308 | 16.88304 | 0.00004 | 0.03649 |
| EFN87950     | -9.24599  | 10.62155 | 16.78021 | 0.00004 | 0.03649 |
| XP_001973709 | -9.21523  | 10.59080 | 16.70407 | 0.00004 | 0.03649 |
| XP_002601470 | -9.19839  | 10.57397 | 16.66239 | 0.00004 | 0.03649 |
| XP_002732922 | 9.22415   | 10.86852 | 16.56410 | 0.00005 | 0.03649 |
| XP_002605693 | -8.97367  | 10.34933 | 16.10643 | 0.00006 | 0.03807 |
| XP_002741302 | -8.95660  | 10.33227 | 16.06424 | 0.00006 | 0.03807 |
| XP_002434442 | -8.95374  | 10.32941 | 16.05715 | 0.00006 | 0.03807 |
| XP_002609450 | -8.94511  | 10.32078 | 16.03583 | 0.00006 | 0.03807 |
| XP_002599067 | -8.83425  | 10.20997 | 15.76179 | 0.00007 | 0.04131 |
| XP_002585781 | -8.80594  | 10.18167 | 15.69185 | 0.00007 | 0.04131 |
| XP_003742476 | -8.72762  | 10.10339 | 15.49839 | 0.00008 | 0.04368 |
| XP_785416    | 8.74077   | 10.38605 | 15.37011 | 0.00009 | 0.04471 |
| XP_782273    | -8.55317  | 9.92904  | 15.06775 | 0.00010 | 0.04538 |
| YP_001474807 | -8.51870  | 9.89459  | 14.98272 | 0.00011 | 0.04538 |
| AAI61151     | -8.47543  | 9.85133  | 14.87597 | 0.00011 | 0.04538 |
| XP_003727072 | -8.45936  | 9.83528  | 14.83636 | 0.00012 | 0.04538 |
| XP_003447001 | 8.51848   | 10.16428 | 14.82215 | 0.00012 | 0.04538 |
| BAC39029     | -8.43081  | 9.80674  | 14.76596 | 0.00012 | 0.04538 |
| AES07023     | -8.42255  | 9.79849  | 14.74559 | 0.00012 | 0.04538 |
| XP_003208890 | -8.40588  | 9.78183  | 14.70450 | 0.00013 | 0.04538 |
| XP_002603759 | -8.38051  | 9.75648  | 14.64197 | 0.00013 | 0.04538 |
| XP_782949    | -8.31952  | 9.69553  | 14.49170 | 0.00014 | 0.04538 |
| ABO61331     | -8.29257  | 9.66859  | 14.42531 | 0.00015 | 0.04538 |
| XP_002613292 | 8.35630   | 10.00253 | 14.42289 | 0.00015 | 0.04538 |
| EFW45850     | 8.31568   | 9.96203  | 14.32298 | 0.00015 | 0.04538 |
| XP_001631596 | -7.91962  | 11.04169 | 14.30354 | 0.00016 | 0.04538 |
| H2A0L8       | -8.23240  | 9.60846  | 14.27713 | 0.00016 | 0.04538 |
| NP_001106507 | 8.29194   | 9.93836  | 14.26461 | 0.00016 | 0.04538 |
| XP_002597426 | 8.29194   | 9.93836  | 14.26461 | 0.00016 | 0.04538 |

|              |          |         |          |         |         |
|--------------|----------|---------|----------|---------|---------|
| XP_003126347 | -8.20857 | 9.58465 | 14.21847 | 0.00016 | 0.04538 |
| XP_426008    | -8.20376 | 9.57984 | 14.20662 | 0.00016 | 0.04538 |
| XP_001748929 | -8.14972 | 9.52584 | 14.07364 | 0.00018 | 0.04548 |
| XP_002600133 | 8.20565  | 9.85234 | 14.05251 | 0.00018 | 0.04548 |
| XP_003222256 | -8.11425 | 9.49040 | 13.98638 | 0.00018 | 0.04548 |
| YP_721699    | -8.09878 | 9.47494 | 13.94833 | 0.00019 | 0.04548 |
| XP_003728402 | 8.13737  | 9.78428 | 13.88479 | 0.00019 | 0.04548 |
| XP_002739711 | -8.06201 | 9.43820 | 13.85793 | 0.00020 | 0.04548 |
| BAL27710     | -8.05134 | 9.42753 | 13.83168 | 0.00020 | 0.04548 |
| EGI61398     | -8.04597 | 9.42217 | 13.81848 | 0.00020 | 0.04548 |
| XP_003741028 | -8.04597 | 9.42217 | 13.81848 | 0.00020 | 0.04548 |
| XP_001625301 | -8.02974 | 9.40595 | 13.77859 | 0.00021 | 0.04548 |
| XP_002606494 | -8.02429 | 9.40051 | 13.76520 | 0.00021 | 0.04548 |
| XP_003701050 | -7.99673 | 9.37297 | 13.69746 | 0.00021 | 0.04558 |
| XP_003690478 | 8.05868  | 9.70585 | 13.69163 | 0.00022 | 0.04558 |
| XP_002741848 | 8.04455  | 9.69177 | 13.65695 | 0.00022 | 0.04559 |
| XP_002736149 | 8.00495  | 9.65231 | 13.55982 | 0.00023 | 0.04559 |
| BAB23185     | -7.93417 | 9.31046 | 13.54379 | 0.00023 | 0.04559 |
| NP_502235    | 7.99763  | 9.64502 | 13.54187 | 0.00023 | 0.04559 |
| EFX84936     | -7.91663 | 9.29294 | 13.50071 | 0.00024 | 0.04559 |
| XP_002740733 | 7.97917  | 9.62662 | 13.49661 | 0.00024 | 0.04559 |
| XP_003727690 | 7.91458  | 9.56228 | 13.33831 | 0.00026 | 0.04694 |
| XP_002130810 | -7.85042 | 9.22678 | 13.33818 | 0.00026 | 0.04694 |
| XP_002602259 | -7.85042 | 9.22678 | 13.33818 | 0.00026 | 0.04694 |
| XP_002427821 | -7.84424 | 9.22062 | 13.32303 | 0.00026 | 0.04694 |
| GAA33255     | 7.89107  | 9.53886 | 13.28073 | 0.00027 | 0.04728 |
| XP_002613584 | 7.85913  | 9.50704 | 13.20249 | 0.00028 | 0.04792 |
| ABO33165     | -7.79389 | 9.17031 | 13.19950 | 0.00028 | 0.04792 |
| CAJ82869     | -7.76803 | 9.14448 | 13.13611 | 0.00029 | 0.04885 |
| ZP_01262383  | -7.74834 | 9.12480 | 13.08782 | 0.00030 | 0.04906 |
| XP_002599303 | 7.79303  | 9.44121 | 13.04070 | 0.00030 | 0.04906 |
| XP_002590998 | -7.72836 | 9.10485 | 13.03886 | 0.00031 | 0.04906 |
| AFI39909     | -7.72165 | 9.09814 | 13.02240 | 0.00031 | 0.04906 |
| XP_002608213 | 7.75447  | 9.40282 | 12.94639 | 0.00032 | 0.04993 |
| XP_003223296 | -7.68757 | 9.06410 | 12.93892 | 0.00032 | 0.04993 |
| XP_002613213 | 7.73700  | 9.38542 | 12.90366 | 0.00033 | 0.05021 |
| AEV89778     | -7.63848 | 9.01506 | 12.81868 | 0.00034 | 0.05155 |
| XP_003696069 | -7.62414 | 9.00073 | 12.78357 | 0.00035 | 0.05155 |
| XP_002604184 | -7.61692 | 8.99352 | 12.76589 | 0.00035 | 0.05155 |
| GAA31306     | 7.66952  | 9.31824 | 12.73876 | 0.00036 | 0.05155 |
| XP_313650    | 7.66491  | 9.31365 | 12.72749 | 0.00036 | 0.05155 |
| XP_002613081 | -7.59503 | 8.97165 | 12.71231 | 0.00036 | 0.05155 |
| XP_001843141 | -7.58024 | 8.95689 | 12.67615 | 0.00037 | 0.05178 |
| XP_421979    | 7.63692  | 9.28579 | 12.65913 | 0.00037 | 0.05178 |

|              |          |          |          |         |         |
|--------------|----------|----------|----------|---------|---------|
| EFN85665     | -7.53497 | 8.91167  | 12.56541 | 0.00039 | 0.05356 |
| EFA84418     | -7.51956 | 8.89627  | 12.52773 | 0.00040 | 0.05356 |
| XP_002603588 | -7.51179 | 8.88852  | 12.50873 | 0.00041 | 0.05356 |
| XP_003728822 | -7.51179 | 8.88852  | 12.50873 | 0.00041 | 0.05356 |
| EFA11608     | -7.49613 | 8.87287  | 12.47045 | 0.00041 | 0.05398 |
| XP_002732097 | -7.48824 | 8.86499  | 12.45115 | 0.00042 | 0.05398 |
| XP_786504    | -7.48030 | 8.85706  | 12.43175 | 0.00042 | 0.05398 |
| XP_002731879 | -7.43993 | 8.81674  | 12.33313 | 0.00044 | 0.05566 |
| XP_001631483 | -7.42346 | 8.80029  | 12.29292 | 0.00045 | 0.05566 |
| XP_002731704 | -7.42346 | 8.80029  | 12.29292 | 0.00045 | 0.05566 |
| XP_002731924 | 7.47245  | 9.12213  | 12.25795 | 0.00046 | 0.05566 |
| XP_002596309 | -7.40681 | 8.78366  | 12.25224 | 0.00046 | 0.05566 |
| XP_001362648 | 7.46185  | 9.11158  | 12.23213 | 0.00047 | 0.05566 |
| XP_001663053 | -7.39841 | 8.77527  | 12.23173 | 0.00047 | 0.05566 |
| XP_003751729 | 7.44581  | 9.09563  | 12.19305 | 0.00048 | 0.05566 |
| GAA29877     | -7.00087 | 10.68109 | 12.18212 | 0.00048 | 0.05566 |
| Q05025       | 7.44042  | 9.09027  | 12.17993 | 0.00048 | 0.05566 |
| AAF09840     | -7.36430 | 8.74121  | 12.14850 | 0.00049 | 0.05583 |
| XP_781514    | -7.35565 | 8.73257  | 12.12739 | 0.00050 | 0.05583 |
| XP_002600118 | 7.40213  | 9.05218  | 12.08672 | 0.00051 | 0.05583 |
| XP_002742050 | -7.32937 | 8.70633  | 12.06329 | 0.00051 | 0.05583 |
| EFX76362     | 7.39101  | 9.04112  | 12.05964 | 0.00052 | 0.05583 |
| XP_003480922 | 7.39101  | 9.04112  | 12.05964 | 0.00052 | 0.05583 |
| XP_002414307 | -7.32051 | 8.69747  | 12.04167 | 0.00052 | 0.05583 |
| YP_131523    | -7.31159 | 8.68856  | 12.01992 | 0.00053 | 0.05583 |
| XP_001023282 | -7.30261 | 8.67960  | 11.99803 | 0.00053 | 0.05583 |
| XP_003401618 | -7.30261 | 8.67960  | 11.99803 | 0.00053 | 0.05583 |
| XP_002609208 | 7.34561  | 8.99598  | 11.94922 | 0.00055 | 0.05630 |
| XP_003646937 | 7.34561  | 8.99598  | 11.94922 | 0.00055 | 0.05630 |
| NP_001232024 | -7.26613 | 8.64318  | 11.90914 | 0.00056 | 0.05702 |
| XP_001635351 | -7.22871 | 8.60581  | 11.81798 | 0.00059 | 0.05936 |
| XP_002601497 | -7.02918 | 9.24389  | 11.78751 | 0.00060 | 0.05982 |
| XP_002591663 | 7.25030  | 8.90122  | 11.71764 | 0.00062 | 0.06110 |
| AEE62746     | 7.24413  | 8.89509  | 11.70266 | 0.00062 | 0.06110 |
| XP_002708436 | -7.18053 | 8.55770  | 11.70068 | 0.00062 | 0.06110 |
| ZP_08909002  | -7.14079 | 8.51802  | 11.60401 | 0.00066 | 0.06356 |
| XP_002939441 | 7.20018  | 8.85141  | 11.59600 | 0.00066 | 0.06356 |
| XP_002607896 | 7.19379  | 8.84506  | 11.58050 | 0.00067 | 0.06357 |
| CAB82366     | -7.12050 | 8.49776  | 11.55467 | 0.00068 | 0.06394 |
| XP_002609379 | 7.17445  | 8.82584  | 11.53360 | 0.00068 | 0.06414 |
| XP_002435427 | -7.09992 | 8.47722  | 11.50466 | 0.00069 | 0.06421 |
| XP_002740460 | 7.16141  | 8.81288  | 11.50199 | 0.00070 | 0.06421 |
| XP_002606415 | 6.72334  | 10.72772 | 11.47483 | 0.00071 | 0.06426 |
| XP_002668154 | 7.14825  | 8.79981  | 11.47009 | 0.00071 | 0.06426 |

|              |          |          |          |         |         |
|--------------|----------|----------|----------|---------|---------|
| XP_001641836 | -7.07905 | 8.45637  | 11.45393 | 0.00071 | 0.06426 |
| XP_002416575 | 7.13497  | 8.78661  | 11.43792 | 0.00072 | 0.06426 |
| XP_003725380 | -7.06850 | 8.44584  | 11.42830 | 0.00072 | 0.06426 |
| ADI24338     | 7.11482  | 8.76659  | 11.38910 | 0.00074 | 0.06513 |
| XP_003388665 | 7.10122  | 8.75309  | 11.35618 | 0.00075 | 0.06545 |
| XP_002160973 | -7.02550 | 8.40291  | 11.32389 | 0.00077 | 0.06545 |
| XP_003705881 | -7.02550 | 8.40291  | 11.32389 | 0.00077 | 0.06545 |
| XP_002594308 | 7.08059  | 8.73260  | 11.30624 | 0.00077 | 0.06545 |
| XP_002943965 | -7.01455 | 8.39198  | 11.29731 | 0.00078 | 0.06545 |
| XP_003212697 | -7.01455 | 8.39198  | 11.29731 | 0.00078 | 0.06545 |
| XP_790859    | -6.56744 | 11.21975 | 11.27431 | 0.00079 | 0.06546 |
| XP_635792    | -7.00351 | 8.38096  | 11.27053 | 0.00079 | 0.06546 |
| XP_002738133 | 7.05262  | 8.70481  | 11.23854 | 0.00080 | 0.06580 |
| CBJ25740     | 7.04554  | 8.69778  | 11.22142 | 0.00081 | 0.06580 |
| XP_003202487 | 7.04554  | 8.69778  | 11.22142 | 0.00081 | 0.06580 |
| XP_001365438 | -6.96988 | 8.34740  | 11.18897 | 0.00082 | 0.06650 |
| XP_002602545 | -6.95850 | 8.33603  | 11.16136 | 0.00084 | 0.06656 |
| XP_002604134 | -6.95850 | 8.33603  | 11.16136 | 0.00084 | 0.06656 |
| ABY20700     | -6.94702 | 8.32458  | 11.13354 | 0.00085 | 0.06656 |
| XP_003747201 | -6.93546 | 8.31303  | 11.10551 | 0.00086 | 0.06656 |
| ZP_01262732  | -6.93546 | 8.31303  | 11.10551 | 0.00086 | 0.06656 |
| XP_002740538 | 6.99498  | 8.64758  | 11.09920 | 0.00086 | 0.06656 |
| XP_798461    | 6.99498  | 8.64758  | 11.09920 | 0.00086 | 0.06656 |
| XP_002590771 | 6.98020  | 8.63291  | 11.06350 | 0.00088 | 0.06681 |
| NP_001082876 | -6.91204 | 8.28966  | 11.04877 | 0.00089 | 0.06681 |
| AAB66556     | -6.90019 | 8.27783  | 11.02007 | 0.00090 | 0.06681 |
| CAG09487     | -6.90019 | 8.27783  | 11.02007 | 0.00090 | 0.06681 |
| XP_002427858 | -6.90019 | 8.27783  | 11.02007 | 0.00090 | 0.06681 |
| XP_783551    | -6.90019 | 8.27783  | 11.02007 | 0.00090 | 0.06681 |
| XP_001603746 | -6.88824 | 8.26590  | 10.99113 | 0.00092 | 0.06743 |
| XP_003449362 | -6.87619 | 8.25387  | 10.96195 | 0.00093 | 0.06807 |
| EHB08796     | -6.86403 | 8.24174  | 10.93254 | 0.00094 | 0.06813 |
| XP_002732889 | 6.91954  | 8.57269  | 10.91706 | 0.00095 | 0.06813 |
| XP_968505    | 6.91954  | 8.57269  | 10.91706 | 0.00095 | 0.06813 |
| ACO51858     | -6.85178 | 8.22951  | 10.90289 | 0.00096 | 0.06813 |
| BAK09601     | -6.85178 | 8.22951  | 10.90289 | 0.00096 | 0.06813 |
| XP_002602771 | 6.90397  | 8.55724  | 10.87949 | 0.00097 | 0.06840 |
| XP_798483    | -6.83942 | 8.21718  | 10.87298 | 0.00098 | 0.06840 |
| XP_003221019 | -6.82695 | 8.20473  | 10.84283 | 0.00099 | 0.06911 |
| ZP_01254585  | -6.81437 | 8.19218  | 10.81242 | 0.00101 | 0.06984 |
| EHJ68398     | -6.80169 | 8.17952  | 10.78175 | 0.00103 | 0.07042 |
| XP_001842802 | 6.85621  | 8.50985  | 10.76438 | 0.00103 | 0.07042 |
| XP_002587109 | 6.85621  | 8.50985  | 10.76438 | 0.00103 | 0.07042 |
| NP_001072851 | -6.78889 | 8.16675  | 10.75082 | 0.00104 | 0.07052 |

|              |          |         |          |         |         |
|--------------|----------|---------|----------|---------|---------|
| XP_794070    | -6.77598 | 8.15386 | 10.71962 | 0.00106 | 0.07131 |
| AEK81538     | -6.76295 | 8.14086 | 10.68815 | 0.00108 | 0.07170 |
| XP_002433513 | -6.76295 | 8.14086 | 10.68815 | 0.00108 | 0.07170 |
| AFE71369     | -6.73653 | 8.11450 | 10.62436 | 0.00112 | 0.07338 |
| XP_002739967 | -6.73653 | 8.11450 | 10.62436 | 0.00112 | 0.07338 |
| XP_002598499 | 6.78997  | 8.44415 | 10.60493 | 0.00113 | 0.07374 |
| BAE39186     | -6.72313 | 8.10113 | 10.59204 | 0.00114 | 0.07375 |
| AAB33368     | -6.70962 | 8.08764 | 10.55942 | 0.00116 | 0.07375 |
| AAL99291     | -6.70962 | 8.08764 | 10.55942 | 0.00116 | 0.07375 |
| XP_002596753 | -6.70962 | 8.08764 | 10.55942 | 0.00116 | 0.07375 |
| AAH72205     | 6.76433  | 8.41872 | 10.54326 | 0.00117 | 0.07375 |
| XP_002603175 | 6.76433  | 8.41872 | 10.54326 | 0.00117 | 0.07375 |
| XP_001637862 | 6.75568  | 8.41014 | 10.52247 | 0.00118 | 0.07395 |
| ABO61332     | -6.68219 | 8.06028 | 10.49328 | 0.00120 | 0.07395 |
| EGT39498     | -6.68219 | 8.06028 | 10.49328 | 0.00120 | 0.07395 |
| XP_003700634 | -6.68219 | 8.06028 | 10.49328 | 0.00120 | 0.07395 |
| XP_002730788 | 6.73822  | 8.39283 | 10.48051 | 0.00121 | 0.07395 |
| ACN91289     | -6.66828 | 8.04640 | 10.45975 | 0.00122 | 0.07395 |
| GAA48059     | -6.66828 | 8.04640 | 10.45975 | 0.00122 | 0.07395 |
| XP_002664535 | -6.66828 | 8.04640 | 10.45975 | 0.00122 | 0.07395 |
| CBL22496     | -6.64006 | 8.01824 | 10.39174 | 0.00127 | 0.07593 |
| XP_002598321 | -6.64006 | 8.01824 | 10.39174 | 0.00127 | 0.07593 |
| XP_001633780 | -6.62573 | 8.00395 | 10.35724 | 0.00129 | 0.07696 |
| BAE90615     | -6.61126 | 7.98951 | 10.32241 | 0.00131 | 0.07721 |
| EDL08213     | -6.59665 | 7.97493 | 10.28724 | 0.00134 | 0.07721 |
| XP_001850184 | -6.59665 | 7.97493 | 10.28724 | 0.00134 | 0.07721 |
| XP_002732920 | -6.59665 | 7.97493 | 10.28724 | 0.00134 | 0.07721 |
| XP_003241032 | -6.59665 | 7.97493 | 10.28724 | 0.00134 | 0.07721 |
| XP_003382138 | 6.63823  | 8.29372 | 10.24058 | 0.00137 | 0.07721 |
| XP_002741129 | 6.62879  | 8.28436 | 10.21795 | 0.00139 | 0.07721 |
| XP_002193200 | -6.56697 | 7.94533 | 10.21584 | 0.00139 | 0.07721 |
| XP_003724601 | -6.56697 | 7.94533 | 10.21584 | 0.00139 | 0.07721 |
| XP_001301486 | 6.61929  | 8.27495 | 10.19518 | 0.00141 | 0.07721 |
| AAX26400     | -6.55190 | 7.93029 | 10.17960 | 0.00142 | 0.07721 |
| CAB70731     | -6.55190 | 7.93029 | 10.17960 | 0.00142 | 0.07721 |
| CAH90435     | -6.55190 | 7.93029 | 10.17960 | 0.00142 | 0.07721 |
| EFX69098     | -6.55190 | 7.93029 | 10.17960 | 0.00142 | 0.07721 |
| XP_003291621 | -6.55190 | 7.93029 | 10.17960 | 0.00142 | 0.07721 |
| XP_003707588 | -6.55190 | 7.93029 | 10.17960 | 0.00142 | 0.07721 |
| XP_003723792 | -6.55190 | 7.93029 | 10.17960 | 0.00142 | 0.07721 |
| EFN60512     | 6.60972  | 8.26547 | 10.17227 | 0.00143 | 0.07721 |
| AAH89352     | -6.53667 | 7.91510 | 10.14300 | 0.00145 | 0.07721 |
| CAL49346     | -6.53667 | 7.91510 | 10.14300 | 0.00145 | 0.07721 |
| XP_002613975 | -6.53667 | 7.91510 | 10.14300 | 0.00145 | 0.07721 |

|              |          |         |          |         |         |
|--------------|----------|---------|----------|---------|---------|
| XP_002738101 | -6.53667 | 7.91510 | 10.14300 | 0.00145 | 0.07721 |
| AAN08149     | -6.52127 | 7.89974 | 10.10602 | 0.00148 | 0.07721 |
| XP_003386162 | -6.52127 | 7.89974 | 10.10602 | 0.00148 | 0.07721 |
| EAY91070     | 6.58063  | 8.23665 | 10.10263 | 0.00148 | 0.07721 |
| NP_001036021 | 6.58063  | 8.23665 | 10.10263 | 0.00148 | 0.07721 |
| XP_002728784 | 6.58063  | 8.23665 | 10.10263 | 0.00148 | 0.07721 |
| CAJ83444     | 6.57080  | 8.22691 | 10.07911 | 0.00150 | 0.07721 |
| CBQ69465     | -6.50571 | 7.88422 | 10.06865 | 0.00151 | 0.07721 |
| XP_001623551 | 6.56090  | 8.21711 | 10.05544 | 0.00152 | 0.07721 |
| XP_002612285 | 6.55094  | 8.20724 | 10.03161 | 0.00154 | 0.07721 |
| ZP_09111650  | 6.55094  | 8.20724 | 10.03161 | 0.00154 | 0.07721 |
| AAX84973     | -6.48999 | 7.86853 | 10.03089 | 0.00154 | 0.07721 |
| AEP17623     | -6.48999 | 7.86853 | 10.03089 | 0.00154 | 0.07721 |
| XP_001807104 | -6.48999 | 7.86853 | 10.03089 | 0.00154 | 0.07721 |
| XP_002122175 | -6.48999 | 7.86853 | 10.03089 | 0.00154 | 0.07721 |
| XP_002589575 | -6.48999 | 7.86853 | 10.03089 | 0.00154 | 0.07721 |
| XP_003387894 | 6.54090  | 8.19730 | 10.00762 | 0.00156 | 0.07749 |
| NP_958889    | -6.47408 | 7.85267 | 9.99273  | 0.00157 | 0.07749 |
| XP_002404411 | -6.47408 | 7.85267 | 9.99273  | 0.00157 | 0.07749 |
| XP_780780    | -6.47408 | 7.85267 | 9.99273  | 0.00157 | 0.07749 |
| AAK95589     | 6.53080  | 8.18730 | 9.98347  | 0.00158 | 0.07756 |
| XP_002608858 | 6.52062  | 8.17722 | 9.95916  | 0.00160 | 0.07826 |
| BAE22050     | -6.44174 | 7.82042 | 9.91517  | 0.00164 | 0.07915 |
| XP_002737009 | -6.44174 | 7.82042 | 9.91517  | 0.00164 | 0.07915 |
| XP_002738835 | -6.44174 | 7.82042 | 9.91517  | 0.00164 | 0.07915 |
| CAX74044     | -6.42530 | 7.80401 | 9.87575  | 0.00167 | 0.08020 |
| XP_002732582 | -6.42530 | 7.80401 | 9.87575  | 0.00167 | 0.08020 |
| AAL37183     | -6.40866 | 7.78742 | 9.83590  | 0.00171 | 0.08034 |
| ADR79275     | -6.40866 | 7.78742 | 9.83590  | 0.00171 | 0.08034 |
| XP_002739336 | -6.40866 | 7.78742 | 9.83590  | 0.00171 | 0.08034 |
| YP_720839    | -6.40866 | 7.78742 | 9.83590  | 0.00171 | 0.08034 |
| XP_001625155 | 6.46864  | 8.12576 | 9.83506  | 0.00171 | 0.08034 |
| CBY06820     | 6.45801  | 8.11524 | 9.80972  | 0.00174 | 0.08067 |
| NP_001191540 | -6.39183 | 7.77064 | 9.79560  | 0.00175 | 0.08067 |
| XP_002600408 | -6.39183 | 7.77064 | 9.79560  | 0.00175 | 0.08067 |
| XP_001373115 | 6.44731  | 8.10465 | 9.78420  | 0.00176 | 0.08067 |
| ABO26647     | -6.37480 | 7.75366 | 9.75484  | 0.00179 | 0.08067 |
| BAC34934     | -6.37480 | 7.75366 | 9.75484  | 0.00179 | 0.08067 |
| CAZ27720     | -6.37480 | 7.75366 | 9.75484  | 0.00179 | 0.08067 |
| CCD21012     | -6.37480 | 7.75366 | 9.75484  | 0.00179 | 0.08067 |
| XP_001514950 | -6.37480 | 7.75366 | 9.75484  | 0.00179 | 0.08067 |
| XP_697184    | -6.37480 | 7.75366 | 9.75484  | 0.00179 | 0.08067 |
| XP_002198814 | 6.42566  | 8.08322 | 9.73260  | 0.00181 | 0.08102 |
| XP_002734374 | 6.42566  | 8.08322 | 9.73260  | 0.00181 | 0.08102 |

|              |          |          |         |         |         |
|--------------|----------|----------|---------|---------|---------|
| BAK40203     | -6.35757 | 7.73648  | 9.71361 | 0.00183 | 0.08155 |
| AEN04481     | 6.40368  | 8.06148  | 9.68025 | 0.00186 | 0.08155 |
| ACE75736     | -6.34013 | 7.71909  | 9.67191 | 0.00187 | 0.08155 |
| BAC06836     | -6.34013 | 7.71909  | 9.67191 | 0.00187 | 0.08155 |
| CAH04106     | -6.34013 | 7.71909  | 9.67191 | 0.00187 | 0.08155 |
| CCA37660     | -6.34013 | 7.71909  | 9.67191 | 0.00187 | 0.08155 |
| XP_002425888 | -6.34013 | 7.71909  | 9.67191 | 0.00187 | 0.08155 |
| AAH08024     | -6.32247 | 7.70148  | 9.62971 | 0.00191 | 0.08263 |
| XP_780658    | -6.32247 | 7.70148  | 9.62971 | 0.00191 | 0.08263 |
| XP_002607850 | 6.38136  | 8.03940  | 9.62713 | 0.00192 | 0.08263 |
| XP_422162    | -6.30460 | 7.68366  | 9.58702 | 0.00196 | 0.08384 |
| XP_800195    | -6.30460 | 7.68366  | 9.58702 | 0.00196 | 0.08384 |
| XP_002605359 | 6.35869  | 8.01697  | 9.57321 | 0.00197 | 0.08385 |
| XP_002736555 | 6.35869  | 8.01697  | 9.57321 | 0.00197 | 0.08385 |
| XP_002401365 | -6.28650 | 7.66562  | 9.54381 | 0.00201 | 0.08459 |
| XP_002425306 | -6.28650 | 7.66562  | 9.54381 | 0.00201 | 0.08459 |
| AEO32528     | -6.26818 | 7.64735  | 9.50007 | 0.00205 | 0.08509 |
| BAC32100     | -6.26818 | 7.64735  | 9.50007 | 0.00205 | 0.08509 |
| EFN88349     | -6.26818 | 7.64735  | 9.50007 | 0.00205 | 0.08509 |
| XP_782331    | -6.26818 | 7.64735  | 9.50007 | 0.00205 | 0.08509 |
| ZP_05502520  | -6.26818 | 7.64735  | 9.50007 | 0.00205 | 0.08509 |
| XP_002735987 | 6.32400  | 7.98267  | 9.49079 | 0.00207 | 0.08522 |
| XP_002594508 | -6.24961 | 7.62885  | 9.45580 | 0.00210 | 0.08576 |
| EFX83224     | 6.30040  | 7.95934  | 9.43476 | 0.00213 | 0.08576 |
| XP_002121660 | 6.30040  | 7.95934  | 9.43476 | 0.00213 | 0.08576 |
| NP_001191543 | -6.23081 | 7.61010  | 9.41097 | 0.00216 | 0.08576 |
| XP_002609620 | -6.23081 | 7.61010  | 9.41097 | 0.00216 | 0.08576 |
| YP_001999719 | -6.23081 | 7.61010  | 9.41097 | 0.00216 | 0.08576 |
| XP_002942405 | 5.84851  | 10.07905 | 9.40674 | 0.00216 | 0.08576 |
| XP_001519063 | 6.27641  | 7.93562  | 9.37786 | 0.00220 | 0.08576 |
| XP_002600359 | 6.27641  | 7.93562  | 9.37786 | 0.00220 | 0.08576 |
| XP_003726941 | 6.27641  | 7.93562  | 9.37786 | 0.00220 | 0.08576 |
| AAH90296     | -6.21176 | 7.59111  | 9.36558 | 0.00221 | 0.08576 |
| EFA01267     | -6.21176 | 7.59111  | 9.36558 | 0.00221 | 0.08576 |
| XP_001516235 | -6.21176 | 7.59111  | 9.36558 | 0.00221 | 0.08576 |
| XP_002599429 | -6.21176 | 7.59111  | 9.36558 | 0.00221 | 0.08576 |
| XP_002601662 | -6.21176 | 7.59111  | 9.36558 | 0.00221 | 0.08576 |
| XP_002741470 | -6.21176 | 7.59111  | 9.36558 | 0.00221 | 0.08576 |
| XP_003229251 | -6.21176 | 7.59111  | 9.36558 | 0.00221 | 0.08576 |
| ZP_04921972  | -6.21176 | 7.59111  | 9.36558 | 0.00221 | 0.08576 |
| EFR23189     | -6.19245 | 7.57186  | 9.31961 | 0.00227 | 0.08622 |
| XP_001516447 | -6.19245 | 7.57186  | 9.31961 | 0.00227 | 0.08622 |
| XP_002592002 | -6.19245 | 7.57186  | 9.31961 | 0.00227 | 0.08622 |
| XP_002600258 | -6.19245 | 7.57186  | 9.31961 | 0.00227 | 0.08622 |

|              |          |          |         |         |         |
|--------------|----------|----------|---------|---------|---------|
| ZP_01066272  | -6.19245 | 7.57186  | 9.31961 | 0.00227 | 0.08622 |
| ZP_06300713  | -6.19245 | 7.57186  | 9.31961 | 0.00227 | 0.08622 |
| XP_001600879 | -6.17288 | 7.55236  | 9.27304 | 0.00233 | 0.08699 |
| XP_002611407 | -6.17288 | 7.55236  | 9.27304 | 0.00233 | 0.08699 |
| XP_002738916 | -6.17288 | 7.55236  | 9.27304 | 0.00233 | 0.08699 |
| XP_002741986 | 6.22720  | 7.88699  | 9.26126 | 0.00234 | 0.08699 |
| ABY75514     | 5.75227  | 10.33727 | 9.23712 | 0.00237 | 0.08699 |
| CCF33422     | 6.21463  | 7.87457  | 9.23151 | 0.00238 | 0.08699 |
| XP_002592165 | 6.21463  | 7.87457  | 9.23151 | 0.00238 | 0.08699 |
| CAL49314     | -6.15304 | 7.53258  | 9.22586 | 0.00239 | 0.08699 |
| XP_001633753 | -6.15304 | 7.53258  | 9.22586 | 0.00239 | 0.08699 |
| XP_002738829 | -6.15304 | 7.53258  | 9.22586 | 0.00239 | 0.08699 |
| ADK38674     | -6.13292 | 7.51254  | 9.17805 | 0.00245 | 0.08699 |
| XP_002732836 | -6.13292 | 7.51254  | 9.17805 | 0.00245 | 0.08699 |
| XP_002740852 | -6.13292 | 7.51254  | 9.17805 | 0.00245 | 0.08699 |
| AAH59873     | -6.11252 | 7.49221  | 9.12960 | 0.00252 | 0.08699 |
| AAH95783     | -6.11252 | 7.49221  | 9.12960 | 0.00252 | 0.08699 |
| EHJ24574     | -6.11252 | 7.49221  | 9.12960 | 0.00252 | 0.08699 |
| XP_001632062 | -6.11252 | 7.49221  | 9.12960 | 0.00252 | 0.08699 |
| XP_002405655 | -6.11252 | 7.49221  | 9.12960 | 0.00252 | 0.08699 |
| XP_002605874 | -6.11252 | 7.49221  | 9.12960 | 0.00252 | 0.08699 |
| XP_002607042 | -6.11252 | 7.49221  | 9.12960 | 0.00252 | 0.08699 |
| XP_002608924 | -6.11252 | 7.49221  | 9.12960 | 0.00252 | 0.08699 |
| XP_002643989 | -6.11252 | 7.49221  | 9.12960 | 0.00252 | 0.08699 |
| EFZ12036     | -6.09183 | 7.47159  | 9.08049 | 0.00258 | 0.08699 |
| EGI63691     | -6.09183 | 7.47159  | 9.08049 | 0.00258 | 0.08699 |
| XP_002735038 | -6.09183 | 7.47159  | 9.08049 | 0.00258 | 0.08699 |
| YP_003387842 | -6.09183 | 7.47159  | 9.08049 | 0.00258 | 0.08699 |
| XP_002613350 | 6.15009  | 7.81082  | 9.07895 | 0.00259 | 0.08699 |
| XP_003206645 | 6.15009  | 7.81082  | 9.07895 | 0.00259 | 0.08699 |
| XP_001344731 | 6.13683  | 7.79773  | 9.04764 | 0.00263 | 0.08699 |
| XP_003505948 | 6.13683  | 7.79773  | 9.04764 | 0.00263 | 0.08699 |
| XP_002739316 | -5.65210 | 10.05969 | 9.03614 | 0.00265 | 0.08699 |
| AAN40846     | -6.07084 | 7.45067  | 9.03069 | 0.00265 | 0.08699 |
| AEF33410     | -6.07084 | 7.45067  | 9.03069 | 0.00265 | 0.08699 |
| AEO33510     | -6.07084 | 7.45067  | 9.03069 | 0.00265 | 0.08699 |
| EHJ71735     | -6.07084 | 7.45067  | 9.03069 | 0.00265 | 0.08699 |
| XP_003724812 | -6.07084 | 7.45067  | 9.03069 | 0.00265 | 0.08699 |
| XP_647665    | -6.07084 | 7.45067  | 9.03069 | 0.00265 | 0.08699 |
| XP_003452834 | 5.68862  | 9.92200  | 9.02525 | 0.00266 | 0.08699 |
| BAE22065     | 6.12344  | 7.78451  | 9.01606 | 0.00268 | 0.08699 |
| ABX82529     | -6.04953 | 7.42944  | 8.98020 | 0.00273 | 0.08699 |
| XP_001946467 | -6.04953 | 7.42944  | 8.98020 | 0.00273 | 0.08699 |
| XP_002607725 | -6.04953 | 7.42944  | 8.98020 | 0.00273 | 0.08699 |

|              |          |          |         |         |         |
|--------------|----------|----------|---------|---------|---------|
| XP_002611765 | -6.04953 | 7.42944  | 8.98020 | 0.00273 | 0.08699 |
| XP_002738623 | -6.04953 | 7.42944  | 8.98020 | 0.00273 | 0.08699 |
| XP_003262676 | -6.04953 | 7.42944  | 8.98020 | 0.00273 | 0.08699 |
| XP_003445121 | -6.04953 | 7.42944  | 8.98020 | 0.00273 | 0.08699 |
| XP_001603629 | 6.09629  | 7.75771  | 8.95206 | 0.00277 | 0.08699 |
| XP_003391145 | 5.72988  | 9.18767  | 8.93806 | 0.00279 | 0.08699 |
| XP_003413538 | -5.56270 | 11.15289 | 8.92922 | 0.00281 | 0.08699 |
| EFN68572     | -6.02791 | 7.40790  | 8.92898 | 0.00281 | 0.08699 |
| NP_083025    | -6.02791 | 7.40790  | 8.92898 | 0.00281 | 0.08699 |
| XP_002408245 | -6.02791 | 7.40790  | 8.92898 | 0.00281 | 0.08699 |
| XP_002591304 | -6.02791 | 7.40790  | 8.92898 | 0.00281 | 0.08699 |
| XP_002824001 | -6.02791 | 7.40790  | 8.92898 | 0.00281 | 0.08699 |
| XP_003445054 | -6.02791 | 7.40790  | 8.92898 | 0.00281 | 0.08699 |
| AAM22012     | 6.08252  | 7.74413  | 8.91962 | 0.00282 | 0.08699 |
| YP_002840971 | 6.08252  | 7.74413  | 8.91962 | 0.00282 | 0.08699 |
| BAE94191     | 6.06862  | 7.73041  | 8.88689 | 0.00287 | 0.08699 |
| EGI62872     | 6.06862  | 7.73041  | 8.88689 | 0.00287 | 0.08699 |
| XP_001634991 | -6.00596 | 7.38603  | 8.87703 | 0.00289 | 0.08699 |
| XP_002594881 | -6.00596 | 7.38603  | 8.87703 | 0.00289 | 0.08699 |
| XP_002604367 | -6.00596 | 7.38603  | 8.87703 | 0.00289 | 0.08699 |
| XP_002610657 | -6.00596 | 7.38603  | 8.87703 | 0.00289 | 0.08699 |
| XP_002736079 | -6.00596 | 7.38603  | 8.87703 | 0.00289 | 0.08699 |
| XP_003149509 | -6.00596 | 7.38603  | 8.87703 | 0.00289 | 0.08699 |
| XP_003443302 | -6.00596 | 7.38603  | 8.87703 | 0.00289 | 0.08699 |
| XP_003704298 | -6.00596 | 7.38603  | 8.87703 | 0.00289 | 0.08699 |
| XP_793640    | -6.00596 | 7.38603  | 8.87703 | 0.00289 | 0.08699 |
| 1713406B     | -5.98367 | 7.36382  | 8.82432 | 0.00297 | 0.08699 |
| EFX90440     | -5.98367 | 7.36382  | 8.82432 | 0.00297 | 0.08699 |
| XP_001607321 | -5.98367 | 7.36382  | 8.82432 | 0.00297 | 0.08699 |
| XP_002424869 | -5.98367 | 7.36382  | 8.82432 | 0.00297 | 0.08699 |
| XP_002430886 | -5.98367 | 7.36382  | 8.82432 | 0.00297 | 0.08699 |
| XP_002590067 | -5.98367 | 7.36382  | 8.82432 | 0.00297 | 0.08699 |
| XP_002608259 | -5.98367 | 7.36382  | 8.82432 | 0.00297 | 0.08699 |
| XP_003379741 | -5.98367 | 7.36382  | 8.82432 | 0.00297 | 0.08699 |
| XP_003495220 | -5.98367 | 7.36382  | 8.82432 | 0.00297 | 0.08699 |
| XP_003706807 | -5.98367 | 7.36382  | 8.82432 | 0.00297 | 0.08699 |
| XP_003724102 | -5.98367 | 7.36382  | 8.82432 | 0.00297 | 0.08699 |
| XP_003728083 | -5.98367 | 7.36382  | 8.82432 | 0.00297 | 0.08699 |
| EFA75352     | 6.04041  | 7.70257  | 8.82052 | 0.00298 | 0.08699 |
| CAF87168     | -5.96103 | 7.34127  | 8.77082 | 0.00306 | 0.08699 |
| CCD82066     | -5.96103 | 7.34127  | 8.77082 | 0.00306 | 0.08699 |
| EHJ70170     | -5.96103 | 7.34127  | 8.77082 | 0.00306 | 0.08699 |
| P07201       | -5.96103 | 7.34127  | 8.77082 | 0.00306 | 0.08699 |
| XP_003223024 | -5.96103 | 7.34127  | 8.77082 | 0.00306 | 0.08699 |

|              |          |         |         |         |         |
|--------------|----------|---------|---------|---------|---------|
| XP_003276168 | -5.96103 | 7.34127 | 8.77082 | 0.00306 | 0.08699 |
| XP_002735518 | 6.01163  | 7.67419 | 8.75289 | 0.00309 | 0.08699 |
| XP_003706805 | 6.01163  | 7.67419 | 8.75289 | 0.00309 | 0.08699 |
| XP_003727906 | 5.99703  | 7.65979 | 8.71860 | 0.00315 | 0.08699 |
| AEO35054     | -5.93802 | 7.31836 | 8.71651 | 0.00315 | 0.08699 |
| CAI46182     | -5.93802 | 7.31836 | 8.71651 | 0.00315 | 0.08699 |
| CAJ30045     | -5.93802 | 7.31836 | 8.71651 | 0.00315 | 0.08699 |
| EFA04949     | -5.93802 | 7.31836 | 8.71651 | 0.00315 | 0.08699 |
| EFX88629     | -5.93802 | 7.31836 | 8.71651 | 0.00315 | 0.08699 |
| EFX89033     | -5.93802 | 7.31836 | 8.71651 | 0.00315 | 0.08699 |
| XP_002124863 | -5.93802 | 7.31836 | 8.71651 | 0.00315 | 0.08699 |
| XP_002597968 | -5.93802 | 7.31836 | 8.71651 | 0.00315 | 0.08699 |
| XP_002735223 | -5.93802 | 7.31836 | 8.71651 | 0.00315 | 0.08699 |
| XP_003255664 | -5.93802 | 7.31836 | 8.71651 | 0.00315 | 0.08699 |
| XP_003448039 | -5.93802 | 7.31836 | 8.71651 | 0.00315 | 0.08699 |
| XP_003448299 | -5.93802 | 7.31836 | 8.71651 | 0.00315 | 0.08699 |
| XP_003693223 | -5.93802 | 7.31836 | 8.71651 | 0.00315 | 0.08699 |
| XP_001637561 | 5.98227  | 7.64524 | 8.68398 | 0.00321 | 0.08699 |
| XP_002939897 | 5.98227  | 7.64524 | 8.68398 | 0.00321 | 0.08699 |
| AAK72969     | -5.91465 | 7.29508 | 8.66137 | 0.00325 | 0.08699 |
| AAV69062     | -5.91465 | 7.29508 | 8.66137 | 0.00325 | 0.08699 |
| CAI40491     | -5.91465 | 7.29508 | 8.66137 | 0.00325 | 0.08699 |
| EFW20245     | -5.91465 | 7.29508 | 8.66137 | 0.00325 | 0.08699 |
| XP_002602361 | -5.91465 | 7.29508 | 8.66137 | 0.00325 | 0.08699 |
| XP_003728064 | -5.91465 | 7.29508 | 8.66137 | 0.00325 | 0.08699 |
| NP_001170929 | 5.96737  | 7.63054 | 8.64901 | 0.00327 | 0.08699 |
| AAK12359     | 5.95230  | 7.61569 | 8.61371 | 0.00334 | 0.08699 |
| XP_002606412 | 5.95230  | 7.61569 | 8.61371 | 0.00334 | 0.08699 |
| XP_003209223 | 5.95230  | 7.61569 | 8.61371 | 0.00334 | 0.08699 |
| XP_003364926 | 5.95230  | 7.61569 | 8.61371 | 0.00334 | 0.08699 |
| AEV53960     | -5.89089 | 7.27142 | 8.60537 | 0.00335 | 0.08699 |
| CAJ83480     | -5.89089 | 7.27142 | 8.60537 | 0.00335 | 0.08699 |
| EFX69526     | -5.89089 | 7.27142 | 8.60537 | 0.00335 | 0.08699 |
| XP_001017101 | -5.89089 | 7.27142 | 8.60537 | 0.00335 | 0.08699 |
| XP_001508218 | -5.89089 | 7.27142 | 8.60537 | 0.00335 | 0.08699 |
| XP_002262216 | -5.89089 | 7.27142 | 8.60537 | 0.00335 | 0.08699 |
| XP_002595411 | -5.89089 | 7.27142 | 8.60537 | 0.00335 | 0.08699 |
| XP_002735625 | -5.89089 | 7.27142 | 8.60537 | 0.00335 | 0.08699 |
| XP_002815001 | -5.89089 | 7.27142 | 8.60537 | 0.00335 | 0.08699 |
| XP_002940311 | -5.89089 | 7.27142 | 8.60537 | 0.00335 | 0.08699 |
| XP_003428681 | -5.89089 | 7.27142 | 8.60537 | 0.00335 | 0.08699 |
| XP_789620    | -5.89089 | 7.27142 | 8.60537 | 0.00335 | 0.08699 |
| NP_001191667 | 5.93708  | 7.60069 | 8.57805 | 0.00340 | 0.08699 |
| XP_002046731 | 5.93708  | 7.60069 | 8.57805 | 0.00340 | 0.08699 |

|              |          |         |         |         |         |
|--------------|----------|---------|---------|---------|---------|
| XP_784034    | 5.93708  | 7.60069 | 8.57805 | 0.00340 | 0.08699 |
| ACN58711     | -5.86673 | 7.24736 | 8.54848 | 0.00346 | 0.08699 |
| CAJ26346     | -5.86673 | 7.24736 | 8.54848 | 0.00346 | 0.08699 |
| XP_001008643 | -5.86673 | 7.24736 | 8.54848 | 0.00346 | 0.08699 |
| XP_001426760 | -5.86673 | 7.24736 | 8.54848 | 0.00346 | 0.08699 |
| XP_002738904 | -5.86673 | 7.24736 | 8.54848 | 0.00346 | 0.08699 |
| XP_002752766 | -5.86673 | 7.24736 | 8.54848 | 0.00346 | 0.08699 |
| XP_003390327 | -5.86673 | 7.24736 | 8.54848 | 0.00346 | 0.08699 |
| XP_786649    | -5.86673 | 7.24736 | 8.54848 | 0.00346 | 0.08699 |
| XP_975362    | -5.86673 | 7.24736 | 8.54848 | 0.00346 | 0.08699 |
| YP_004179856 | -5.86673 | 7.24736 | 8.54848 | 0.00346 | 0.08699 |
| ZP_09483044  | -5.86673 | 7.24736 | 8.54848 | 0.00346 | 0.08699 |
| AAR39412     | 5.92170  | 7.58553 | 8.54204 | 0.00347 | 0.08699 |
| XP_003377920 | 5.92170  | 7.58553 | 8.54204 | 0.00347 | 0.08699 |
| XP_003723764 | 5.92170  | 7.58553 | 8.54204 | 0.00347 | 0.08699 |
| NP_001155276 | 5.90615  | 7.57021 | 8.50567 | 0.00354 | 0.08699 |
| XP_002115163 | 5.90615  | 7.57021 | 8.50567 | 0.00354 | 0.08699 |
| XP_002193920 | 5.90615  | 7.57021 | 8.50567 | 0.00354 | 0.08699 |
| XP_002596572 | 5.90615  | 7.57021 | 8.50567 | 0.00354 | 0.08699 |
| XP_003425652 | 5.90615  | 7.57021 | 8.50567 | 0.00354 | 0.08699 |
| AAV86961     | -5.84216 | 7.22290 | 8.49068 | 0.00357 | 0.08699 |
| EHV55556     | -5.84216 | 7.22290 | 8.49068 | 0.00357 | 0.08699 |
| XP_002070310 | -5.84216 | 7.22290 | 8.49068 | 0.00357 | 0.08699 |
| XP_002169253 | -5.84216 | 7.22290 | 8.49068 | 0.00357 | 0.08699 |
| XP_002588513 | -5.84216 | 7.22290 | 8.49068 | 0.00357 | 0.08699 |
| XP_002611352 | -5.84216 | 7.22290 | 8.49068 | 0.00357 | 0.08699 |
| XP_002698598 | -5.84216 | 7.22290 | 8.49068 | 0.00357 | 0.08699 |
| XP_536929    | -5.84216 | 7.22290 | 8.49068 | 0.00357 | 0.08699 |
| XP_002400528 | -5.65648 | 7.88110 | 8.48731 | 0.00358 | 0.08699 |
| AAH24689     | 5.89043  | 7.55472 | 8.46892 | 0.00361 | 0.08699 |
| AAI69208     | 5.89043  | 7.55472 | 8.46892 | 0.00361 | 0.08699 |
| XP_002610105 | 5.89043  | 7.55472 | 8.46892 | 0.00361 | 0.08699 |
| XP_003217401 | 5.89043  | 7.55472 | 8.46892 | 0.00361 | 0.08699 |
| AAT09325     | -5.81717 | 7.19802 | 8.43193 | 0.00369 | 0.08699 |
| BAA78421     | -5.81717 | 7.19802 | 8.43193 | 0.00369 | 0.08699 |
| CAX33834     | -5.81717 | 7.19802 | 8.43193 | 0.00369 | 0.08699 |
| EFN66701     | -5.81717 | 7.19802 | 8.43193 | 0.00369 | 0.08699 |
| EFN68468     | -5.81717 | 7.19802 | 8.43193 | 0.00369 | 0.08699 |
| EGI59904     | -5.81717 | 7.19802 | 8.43193 | 0.00369 | 0.08699 |
| XP_001623622 | -5.81717 | 7.19802 | 8.43193 | 0.00369 | 0.08699 |
| XP_001637157 | -5.81717 | 7.19802 | 8.43193 | 0.00369 | 0.08699 |
| XP_001992750 | -5.81717 | 7.19802 | 8.43193 | 0.00369 | 0.08699 |
| XP_002399509 | -5.81717 | 7.19802 | 8.43193 | 0.00369 | 0.08699 |
| XP_002735917 | -5.81717 | 7.19802 | 8.43193 | 0.00369 | 0.08699 |

|              |          |          |         |         |         |
|--------------|----------|----------|---------|---------|---------|
| XP_002742001 | -5.81717 | 7.19802  | 8.43193 | 0.00369 | 0.08699 |
| XP_785443    | -5.81717 | 7.19802  | 8.43193 | 0.00369 | 0.08699 |
| XP_001628920 | 5.87453  | 7.53907  | 8.43179 | 0.00369 | 0.08699 |
| XP_001640068 | 5.87453  | 7.53907  | 8.43179 | 0.00369 | 0.08699 |
| XP_003199319 | 5.87453  | 7.53907  | 8.43179 | 0.00369 | 0.08699 |
| XP_002742380 | 5.65760  | 8.18983  | 8.41661 | 0.00372 | 0.08699 |
| CAF21863     | 5.85847  | 7.52324  | 8.39427 | 0.00376 | 0.08699 |
| EGR50668     | 5.85847  | 7.52324  | 8.39427 | 0.00376 | 0.08699 |
| XP_002608670 | 5.85847  | 7.52324  | 8.39427 | 0.00376 | 0.08699 |
| XP_002612503 | 5.85847  | 7.52324  | 8.39427 | 0.00376 | 0.08699 |
| XP_002732400 | 5.85847  | 7.52324  | 8.39427 | 0.00376 | 0.08699 |
| XP_419581    | 5.85847  | 7.52324  | 8.39427 | 0.00376 | 0.08699 |
| AEO34023     | -5.79173 | 7.17269  | 8.37221 | 0.00381 | 0.08699 |
| BAE39153     | -5.79173 | 7.17269  | 8.37221 | 0.00381 | 0.08699 |
| CBK21306     | -5.79173 | 7.17269  | 8.37221 | 0.00381 | 0.08699 |
| EAW94898     | -5.79173 | 7.17269  | 8.37221 | 0.00381 | 0.08699 |
| EFX67003     | -5.79173 | 7.17269  | 8.37221 | 0.00381 | 0.08699 |
| EGT56672     | -5.79173 | 7.17269  | 8.37221 | 0.00381 | 0.08699 |
| NP_001245290 | -5.79173 | 7.17269  | 8.37221 | 0.00381 | 0.08699 |
| XP_001605649 | -5.79173 | 7.17269  | 8.37221 | 0.00381 | 0.08699 |
| XP_001633418 | -5.79173 | 7.17269  | 8.37221 | 0.00381 | 0.08699 |
| XP_002427447 | -5.79173 | 7.17269  | 8.37221 | 0.00381 | 0.08699 |
| XP_002606880 | -5.79173 | 7.17269  | 8.37221 | 0.00381 | 0.08699 |
| XP_002608868 | -5.79173 | 7.17269  | 8.37221 | 0.00381 | 0.08699 |
| XP_003471921 | -5.79173 | 7.17269  | 8.37221 | 0.00381 | 0.08699 |
| XP_785456    | -5.79173 | 7.17269  | 8.37221 | 0.00381 | 0.08699 |
| XP_969024    | -5.79173 | 7.17269  | 8.37221 | 0.00381 | 0.08699 |
| XP_002736461 | -5.33422 | 10.49879 | 8.35754 | 0.00384 | 0.08699 |
| BAD99027     | 5.84221  | 7.50724  | 8.35636 | 0.00384 | 0.08699 |
| XP_001635963 | 5.84221  | 7.50724  | 8.35636 | 0.00384 | 0.08699 |
| XP_001652929 | 5.84221  | 7.50724  | 8.35636 | 0.00384 | 0.08699 |
| XP_001989824 | 5.84221  | 7.50724  | 8.35636 | 0.00384 | 0.08699 |
| XP_002588348 | 5.84221  | 7.50724  | 8.35636 | 0.00384 | 0.08699 |
| XP_002933745 | -5.33820 | 10.00903 | 8.32145 | 0.00392 | 0.08699 |
| ADL62715     | 5.82578  | 7.49106  | 8.31804 | 0.00393 | 0.08699 |
| EFA84096     | 5.82578  | 7.49106  | 8.31804 | 0.00393 | 0.08699 |
| XP_002741344 | 5.82578  | 7.49106  | 8.31804 | 0.00393 | 0.08699 |
| AAI69185     | -5.76584 | 7.14692  | 8.31149 | 0.00394 | 0.08699 |
| AAV84265     | -5.76584 | 7.14692  | 8.31149 | 0.00394 | 0.08699 |
| NP_001073671 | -5.76584 | 7.14692  | 8.31149 | 0.00394 | 0.08699 |
| XP_002162663 | -5.76584 | 7.14692  | 8.31149 | 0.00394 | 0.08699 |
| XP_002592492 | -5.76584 | 7.14692  | 8.31149 | 0.00394 | 0.08699 |
| XP_002601381 | -5.76584 | 7.14692  | 8.31149 | 0.00394 | 0.08699 |
| XP_002605750 | -5.76584 | 7.14692  | 8.31149 | 0.00394 | 0.08699 |

|              |          |          |         |         |         |
|--------------|----------|----------|---------|---------|---------|
| XP_002612895 | -5.76584 | 7.14692  | 8.31149 | 0.00394 | 0.08699 |
| XP_002736557 | -5.76584 | 7.14692  | 8.31149 | 0.00394 | 0.08699 |
| XP_422260    | -5.76584 | 7.14692  | 8.31149 | 0.00394 | 0.08699 |
| XP_002739922 | 5.80915  | 7.47469  | 8.27931 | 0.00401 | 0.08783 |
| XP_791927    | -5.26332 | 11.75548 | 8.25921 | 0.00405 | 0.08783 |
| AAV48595     | -5.73947 | 7.12068  | 8.24971 | 0.00408 | 0.08783 |
| ACH89433     | -5.73947 | 7.12068  | 8.24971 | 0.00408 | 0.08783 |
| AER98881     | -5.73947 | 7.12068  | 8.24971 | 0.00408 | 0.08783 |
| NP_957183    | -5.73947 | 7.12068  | 8.24971 | 0.00408 | 0.08783 |
| XP_002190212 | -5.73947 | 7.12068  | 8.24971 | 0.00408 | 0.08783 |
| XP_002433601 | -5.73947 | 7.12068  | 8.24971 | 0.00408 | 0.08783 |
| XP_002434360 | -5.73947 | 7.12068  | 8.24971 | 0.00408 | 0.08783 |
| XP_002597222 | -5.73947 | 7.12068  | 8.24971 | 0.00408 | 0.08783 |
| XP_002607260 | -5.73947 | 7.12068  | 8.24971 | 0.00408 | 0.08783 |
| XP_002940183 | -5.73947 | 7.12068  | 8.24971 | 0.00408 | 0.08783 |
| XP_415238    | -5.73947 | 7.12068  | 8.24971 | 0.00408 | 0.08783 |
| XP_002593922 | 5.79233  | 7.45814  | 8.24016 | 0.00410 | 0.08797 |
| XP_974007    | -5.54130 | 7.76727  | 8.21621 | 0.00415 | 0.08797 |
| EDL24736     | 5.77532  | 7.44140  | 8.20058 | 0.00419 | 0.08797 |
| XP_002734689 | 5.77532  | 7.44140  | 8.20058 | 0.00419 | 0.08797 |
| XP_967104    | 5.77532  | 7.44140  | 8.20058 | 0.00419 | 0.08797 |
| EAW75624     | -5.71262 | 7.09395  | 8.18686 | 0.00422 | 0.08797 |
| EFX83489     | -5.71262 | 7.09395  | 8.18686 | 0.00422 | 0.08797 |
| XP_001632203 | -5.71262 | 7.09395  | 8.18686 | 0.00422 | 0.08797 |
| XP_002598814 | -5.71262 | 7.09395  | 8.18686 | 0.00422 | 0.08797 |
| XP_002742202 | -5.71262 | 7.09395  | 8.18686 | 0.00422 | 0.08797 |
| XP_002413853 | 5.75810  | 7.42445  | 8.16055 | 0.00428 | 0.08797 |
| XP_002593669 | 5.75810  | 7.42445  | 8.16055 | 0.00428 | 0.08797 |
| XP_003391309 | 5.75810  | 7.42445  | 8.16055 | 0.00428 | 0.08797 |
| 2XNF_A       | -5.68525 | 7.06672  | 8.12289 | 0.00437 | 0.08797 |
| AAM91821     | -5.68525 | 7.06672  | 8.12289 | 0.00437 | 0.08797 |
| ACG75958     | -5.68525 | 7.06672  | 8.12289 | 0.00437 | 0.08797 |
| AES02438     | -5.68525 | 7.06672  | 8.12289 | 0.00437 | 0.08797 |
| AES03553     | -5.68525 | 7.06672  | 8.12289 | 0.00437 | 0.08797 |
| CAA59198     | -5.68525 | 7.06672  | 8.12289 | 0.00437 | 0.08797 |
| EFN66218     | -5.68525 | 7.06672  | 8.12289 | 0.00437 | 0.08797 |
| GAA50512     | -5.68525 | 7.06672  | 8.12289 | 0.00437 | 0.08797 |
| NP_001135486 | -5.68525 | 7.06672  | 8.12289 | 0.00437 | 0.08797 |
| NP_001164310 | -5.68525 | 7.06672  | 8.12289 | 0.00437 | 0.08797 |
| XP_001621329 | -5.68525 | 7.06672  | 8.12289 | 0.00437 | 0.08797 |
| XP_001627192 | -5.68525 | 7.06672  | 8.12289 | 0.00437 | 0.08797 |
| XP_002063027 | -5.68525 | 7.06672  | 8.12289 | 0.00437 | 0.08797 |
| XP_002613173 | -5.68525 | 7.06672  | 8.12289 | 0.00437 | 0.08797 |
| XP_002712574 | -5.68525 | 7.06672  | 8.12289 | 0.00437 | 0.08797 |

|              |          |         |         |         |         |
|--------------|----------|---------|---------|---------|---------|
| XP_002734698 | -5.68525 | 7.06672 | 8.12289 | 0.00437 | 0.08797 |
| XP_002735688 | -5.68525 | 7.06672 | 8.12289 | 0.00437 | 0.08797 |
| XP_002942697 | -5.68525 | 7.06672 | 8.12289 | 0.00437 | 0.08797 |
| XP_003206052 | -5.68525 | 7.06672 | 8.12289 | 0.00437 | 0.08797 |
| XP_640602    | -5.68525 | 7.06672 | 8.12289 | 0.00437 | 0.08797 |
| XP_701169    | -5.68525 | 7.06672 | 8.12289 | 0.00437 | 0.08797 |
| XP_785654    | -5.68525 | 7.06672 | 8.12289 | 0.00437 | 0.08797 |
| CAA67544     | 5.74067  | 7.40731 | 8.12008 | 0.00438 | 0.08797 |
| CAG04340     | 5.74067  | 7.40731 | 8.12008 | 0.00438 | 0.08797 |
| NP_001079493 | 5.74067  | 7.40731 | 8.12008 | 0.00438 | 0.08797 |
| AAH94402     | 5.72303  | 7.38996 | 8.07914 | 0.00448 | 0.08797 |
| EFX81396     | 5.72303  | 7.38996 | 8.07914 | 0.00448 | 0.08797 |
| XP_002077667 | 5.72303  | 7.38996 | 8.07914 | 0.00448 | 0.08797 |
| XP_417386    | 5.72303  | 7.38996 | 8.07914 | 0.00448 | 0.08797 |
| YP_006354273 | 5.72303  | 7.38996 | 8.07914 | 0.00448 | 0.08797 |
| AAH94088     | -5.65736 | 7.03897 | 8.05776 | 0.00453 | 0.08797 |
| AEO34555     | -5.65736 | 7.03897 | 8.05776 | 0.00453 | 0.08797 |
| BAE35720     | -5.65736 | 7.03897 | 8.05776 | 0.00453 | 0.08797 |
| NP_998032    | -5.65736 | 7.03897 | 8.05776 | 0.00453 | 0.08797 |
| XP_001944340 | -5.65736 | 7.03897 | 8.05776 | 0.00453 | 0.08797 |
| XP_001999880 | -5.65736 | 7.03897 | 8.05776 | 0.00453 | 0.08797 |
| XP_002127989 | -5.65736 | 7.03897 | 8.05776 | 0.00453 | 0.08797 |
| XP_002197995 | -5.65736 | 7.03897 | 8.05776 | 0.00453 | 0.08797 |
| XP_002587935 | -5.65736 | 7.03897 | 8.05776 | 0.00453 | 0.08797 |
| ACQ91104     | -5.47110 | 7.69795 | 8.05161 | 0.00455 | 0.08797 |
| NP_001019499 | -5.47110 | 7.69795 | 8.05161 | 0.00455 | 0.08797 |
| NP_001133096 | -5.47110 | 7.69795 | 8.05161 | 0.00455 | 0.08797 |
| XP_001624678 | -5.47110 | 7.69795 | 8.05161 | 0.00455 | 0.08797 |
| XP_003427871 | 5.70517  | 7.37240 | 8.03774 | 0.00458 | 0.08797 |
| XP_003459722 | 5.70517  | 7.37240 | 8.03774 | 0.00458 | 0.08797 |
| XP_796434    | 5.70517  | 7.37240 | 8.03774 | 0.00458 | 0.08797 |
| AEK10750     | -5.20312 | 9.99028 | 8.01498 | 0.00464 | 0.08797 |
| XP_002607858 | 5.68708  | 7.35462 | 7.99585 | 0.00469 | 0.08797 |
| ACN91277     | -5.62891 | 7.01067 | 7.99144 | 0.00470 | 0.08797 |
| ADX31291     | -5.62891 | 7.01067 | 7.99144 | 0.00470 | 0.08797 |
| BAE39125     | -5.62891 | 7.01067 | 7.99144 | 0.00470 | 0.08797 |
| CAI21694     | -5.62891 | 7.01067 | 7.99144 | 0.00470 | 0.08797 |
| XP_001121484 | -5.62891 | 7.01067 | 7.99144 | 0.00470 | 0.08797 |
| XP_001184164 | -5.62891 | 7.01067 | 7.99144 | 0.00470 | 0.08797 |
| XP_001188982 | -5.62891 | 7.01067 | 7.99144 | 0.00470 | 0.08797 |
| XP_001201290 | -5.62891 | 7.01067 | 7.99144 | 0.00470 | 0.08797 |
| XP_001863343 | -5.62891 | 7.01067 | 7.99144 | 0.00470 | 0.08797 |
| XP_002595371 | -5.62891 | 7.01067 | 7.99144 | 0.00470 | 0.08797 |
| XP_002610132 | -5.62891 | 7.01067 | 7.99144 | 0.00470 | 0.08797 |

|              |          |         |         |         |         |
|--------------|----------|---------|---------|---------|---------|
| XP_003220431 | -5.62891 | 7.01067 | 7.99144 | 0.00470 | 0.08797 |
| XP_003223090 | -5.62891 | 7.01067 | 7.99144 | 0.00470 | 0.08797 |
| XP_003247452 | -5.62891 | 7.01067 | 7.99144 | 0.00470 | 0.08797 |
| XP_003293760 | -5.62891 | 7.01067 | 7.99144 | 0.00470 | 0.08797 |
| XP_793995    | -5.62891 | 7.01067 | 7.99144 | 0.00470 | 0.08797 |
| XP_001639778 | 5.66877  | 7.33662 | 7.95346 | 0.00480 | 0.08797 |
| XP_002610097 | 5.66877  | 7.33662 | 7.95346 | 0.00480 | 0.08797 |
| ABS88697     | -5.59990 | 6.98180 | 7.92386 | 0.00488 | 0.08797 |
| ACO08993     | -5.59990 | 6.98180 | 7.92386 | 0.00488 | 0.08797 |
| AEO36020     | -5.59990 | 6.98180 | 7.92386 | 0.00488 | 0.08797 |
| EFX73186     | -5.59990 | 6.98180 | 7.92386 | 0.00488 | 0.08797 |
| EFX88195     | -5.59990 | 6.98180 | 7.92386 | 0.00488 | 0.08797 |
| NP_001082284 | -5.59990 | 6.98180 | 7.92386 | 0.00488 | 0.08797 |
| NP_001128702 | -5.59990 | 6.98180 | 7.92386 | 0.00488 | 0.08797 |
| Q964E3       | -5.59990 | 6.98180 | 7.92386 | 0.00488 | 0.08797 |
| XP_001917051 | -5.59990 | 6.98180 | 7.92386 | 0.00488 | 0.08797 |
| XP_002431014 | -5.59990 | 6.98180 | 7.92386 | 0.00488 | 0.08797 |
| XP_002431121 | -5.59990 | 6.98180 | 7.92386 | 0.00488 | 0.08797 |
| XP_002606187 | -5.59990 | 6.98180 | 7.92386 | 0.00488 | 0.08797 |
| XP_002733477 | -5.59990 | 6.98180 | 7.92386 | 0.00488 | 0.08797 |
| XP_002733718 | -5.59990 | 6.98180 | 7.92386 | 0.00488 | 0.08797 |
| XP_002736186 | -5.59990 | 6.98180 | 7.92386 | 0.00488 | 0.08797 |
| XP_002741112 | -5.59990 | 6.98180 | 7.92386 | 0.00488 | 0.08797 |
| XP_003143113 | -5.59990 | 6.98180 | 7.92386 | 0.00488 | 0.08797 |
| XP_003397232 | -5.59990 | 6.98180 | 7.92386 | 0.00488 | 0.08797 |
| XP_003745138 | -5.59990 | 6.98180 | 7.92386 | 0.00488 | 0.08797 |
| XP_850799    | -5.59990 | 6.98180 | 7.92386 | 0.00488 | 0.08797 |
| YP_747305    | -5.59990 | 6.98180 | 7.92386 | 0.00488 | 0.08797 |
| AAH65041     | 5.65022  | 7.31839 | 7.91057 | 0.00491 | 0.08797 |
| AAX27930     | 5.65022  | 7.31839 | 7.91057 | 0.00491 | 0.08797 |
| AES05754     | 5.65022  | 7.31839 | 7.91057 | 0.00491 | 0.08797 |
| BAA94854     | 5.65022  | 7.31839 | 7.91057 | 0.00491 | 0.08797 |
| XP_002148768 | 5.65022  | 7.31839 | 7.91057 | 0.00491 | 0.08797 |
| YP_002841142 | 5.65022  | 7.31839 | 7.91057 | 0.00491 | 0.08797 |
| BAD99026     | 5.63143  | 7.29993 | 7.86717 | 0.00503 | 0.08797 |
| NP_001139049 | 5.63143  | 7.29993 | 7.86717 | 0.00503 | 0.08797 |
| XP_001313629 | 5.63143  | 7.29993 | 7.86717 | 0.00503 | 0.08797 |
| XP_002590332 | 5.63143  | 7.29993 | 7.86717 | 0.00503 | 0.08797 |
| XP_002680168 | 5.63143  | 7.29993 | 7.86717 | 0.00503 | 0.08797 |
| XP_003443882 | 5.63143  | 7.29993 | 7.86717 | 0.00503 | 0.08797 |
| 3R2B_A       | -5.57028 | 6.95235 | 7.85499 | 0.00507 | 0.08797 |
| AAI61792     | -5.57028 | 6.95235 | 7.85499 | 0.00507 | 0.08797 |
| ACN91297     | -5.57028 | 6.95235 | 7.85499 | 0.00507 | 0.08797 |
| ADD18698     | -5.57028 | 6.95235 | 7.85499 | 0.00507 | 0.08797 |

|              |          |         |         |         |         |
|--------------|----------|---------|---------|---------|---------|
| CAF33263     | -5.57028 | 6.95235 | 7.85499 | 0.00507 | 0.08797 |
| NP_001009986 | -5.57028 | 6.95235 | 7.85499 | 0.00507 | 0.08797 |
| XP_001636613 | -5.57028 | 6.95235 | 7.85499 | 0.00507 | 0.08797 |
| XP_001640172 | -5.57028 | 6.95235 | 7.85499 | 0.00507 | 0.08797 |
| XP_001647647 | -5.57028 | 6.95235 | 7.85499 | 0.00507 | 0.08797 |
| XP_001895717 | -5.57028 | 6.95235 | 7.85499 | 0.00507 | 0.08797 |
| XP_002131970 | -5.57028 | 6.95235 | 7.85499 | 0.00507 | 0.08797 |
| XP_002591357 | -5.57028 | 6.95235 | 7.85499 | 0.00507 | 0.08797 |
| XP_002603898 | -5.57028 | 6.95235 | 7.85499 | 0.00507 | 0.08797 |
| XP_002732174 | -5.57028 | 6.95235 | 7.85499 | 0.00507 | 0.08797 |
| XP_312429    | -5.57028 | 6.95235 | 7.85499 | 0.00507 | 0.08797 |
| XP_320464    | -5.57028 | 6.95235 | 7.85499 | 0.00507 | 0.08797 |
| XP_636792    | -5.57028 | 6.95235 | 7.85499 | 0.00507 | 0.08797 |
| XP_797423    | -5.57028 | 6.95235 | 7.85499 | 0.00507 | 0.08797 |
| EDL16829     | 5.61239  | 7.28123 | 7.82323 | 0.00516 | 0.08797 |
| XP_002737958 | 5.61239  | 7.28123 | 7.82323 | 0.00516 | 0.08797 |
| XP_003365356 | 5.61239  | 7.28123 | 7.82323 | 0.00516 | 0.08797 |
| XP_629009    | 5.61239  | 7.28123 | 7.82323 | 0.00516 | 0.08797 |
| XP_001019230 | -5.54005 | 6.92228 | 7.78478 | 0.00527 | 0.08797 |
| XP_001296210 | -5.54005 | 6.92228 | 7.78478 | 0.00527 | 0.08797 |
| XP_001329169 | -5.54005 | 6.92228 | 7.78478 | 0.00527 | 0.08797 |
| XP_002435466 | -5.54005 | 6.92228 | 7.78478 | 0.00527 | 0.08797 |
| XP_002593187 | -5.54005 | 6.92228 | 7.78478 | 0.00527 | 0.08797 |
| XP_002735710 | -5.54005 | 6.92228 | 7.78478 | 0.00527 | 0.08797 |
| XP_002736550 | -5.54005 | 6.92228 | 7.78478 | 0.00527 | 0.08797 |
| XP_002738667 | -5.54005 | 6.92228 | 7.78478 | 0.00527 | 0.08797 |
| XP_002739921 | -5.54005 | 6.92228 | 7.78478 | 0.00527 | 0.08797 |
| XP_003213845 | -5.54005 | 6.92228 | 7.78478 | 0.00527 | 0.08797 |
| XP_003498564 | -5.54005 | 6.92228 | 7.78478 | 0.00527 | 0.08797 |
| XP_424694    | -5.54005 | 6.92228 | 7.78478 | 0.00527 | 0.08797 |
| XP_002606696 | 5.59310  | 7.26229 | 7.77875 | 0.00529 | 0.08797 |
| XP_003198228 | 5.59310  | 7.26229 | 7.77875 | 0.00529 | 0.08797 |
| AAP41214     | 5.57354  | 7.24309 | 7.73371 | 0.00542 | 0.08797 |
| XP_001316844 | 5.57354  | 7.24309 | 7.73371 | 0.00542 | 0.08797 |
| XP_002730929 | 5.57354  | 7.24309 | 7.73371 | 0.00542 | 0.08797 |
| XP_002912748 | 5.57354  | 7.24309 | 7.73371 | 0.00542 | 0.08797 |
| CAI15956     | -5.50917 | 6.89158 | 7.71317 | 0.00548 | 0.08797 |
| DAA16422     | -5.50917 | 6.89158 | 7.71317 | 0.00548 | 0.08797 |
| EGW05886     | -5.50917 | 6.89158 | 7.71317 | 0.00548 | 0.08797 |
| EHA98399     | -5.50917 | 6.89158 | 7.71317 | 0.00548 | 0.08797 |
| EHB09998     | -5.50917 | 6.89158 | 7.71317 | 0.00548 | 0.08797 |
| XP_001351550 | -5.50917 | 6.89158 | 7.71317 | 0.00548 | 0.08797 |
| XP_001367489 | -5.50917 | 6.89158 | 7.71317 | 0.00548 | 0.08797 |
| XP_001629536 | -5.50917 | 6.89158 | 7.71317 | 0.00548 | 0.08797 |

|              |          |         |         |         |         |
|--------------|----------|---------|---------|---------|---------|
| XP_001772366 | -5.50917 | 6.89158 | 7.71317 | 0.00548 | 0.08797 |
| XP_001842282 | -5.50917 | 6.89158 | 7.71317 | 0.00548 | 0.08797 |
| XP_001844033 | -5.50917 | 6.89158 | 7.71317 | 0.00548 | 0.08797 |
| XP_001994475 | -5.50917 | 6.89158 | 7.71317 | 0.00548 | 0.08797 |
| XP_002588882 | -5.50917 | 6.89158 | 7.71317 | 0.00548 | 0.08797 |
| XP_002592263 | -5.50917 | 6.89158 | 7.71317 | 0.00548 | 0.08797 |
| XP_002599089 | -5.50917 | 6.89158 | 7.71317 | 0.00548 | 0.08797 |
| XP_002605575 | -5.50917 | 6.89158 | 7.71317 | 0.00548 | 0.08797 |
| XP_002730499 | -5.50917 | 6.89158 | 7.71317 | 0.00548 | 0.08797 |
| XP_002739059 | -5.50917 | 6.89158 | 7.71317 | 0.00548 | 0.08797 |
| XP_002741281 | -5.50917 | 6.89158 | 7.71317 | 0.00548 | 0.08797 |
| XP_002742061 | -5.50917 | 6.89158 | 7.71317 | 0.00548 | 0.08797 |
| XP_002940872 | -5.50917 | 6.89158 | 7.71317 | 0.00548 | 0.08797 |
| XP_003731438 | -5.50917 | 6.89158 | 7.71317 | 0.00548 | 0.08797 |
| XP_646649    | -5.50917 | 6.89158 | 7.71317 | 0.00548 | 0.08797 |
| XP_788604    | -5.50917 | 6.89158 | 7.71317 | 0.00548 | 0.08797 |
| ZP_08205869  | -5.50917 | 6.89158 | 7.71317 | 0.00548 | 0.08797 |
| AAC00207     | 5.55372  | 7.22363 | 7.68810 | 0.00556 | 0.08797 |
| AAI46846     | 5.55372  | 7.22363 | 7.68810 | 0.00556 | 0.08797 |
| EFZ11915     | 5.55372  | 7.22363 | 7.68810 | 0.00556 | 0.08797 |
| NP_001087022 | 5.55372  | 7.22363 | 7.68810 | 0.00556 | 0.08797 |
| XP_002129966 | 5.55372  | 7.22363 | 7.68810 | 0.00556 | 0.08797 |
| XP_002602847 | 5.55372  | 7.22363 | 7.68810 | 0.00556 | 0.08797 |
| XP_002738789 | 5.55372  | 7.22363 | 7.68810 | 0.00556 | 0.08797 |
| XP_003742500 | 5.55372  | 7.22363 | 7.68810 | 0.00556 | 0.08797 |
| XP_973407    | 5.55372  | 7.22363 | 7.68810 | 0.00556 | 0.08797 |
| YP_001958455 | 5.33893  | 7.87769 | 7.67378 | 0.00560 | 0.08797 |
| AEO35323     | 5.53362  | 7.20391 | 7.64190 | 0.00570 | 0.08797 |
| XP_002602373 | 5.53362  | 7.20391 | 7.64190 | 0.00570 | 0.08797 |
| XP_002734510 | 5.53362  | 7.20391 | 7.64190 | 0.00570 | 0.08797 |
| XP_002734543 | 5.53362  | 7.20391 | 7.64190 | 0.00570 | 0.08797 |
| XP_002734661 | 5.53362  | 7.20391 | 7.64190 | 0.00570 | 0.08797 |
| XP_002737120 | 5.53362  | 7.20391 | 7.64190 | 0.00570 | 0.08797 |
| XP_003117370 | 5.53362  | 7.20391 | 7.64190 | 0.00570 | 0.08797 |
| XP_003724058 | 5.53362  | 7.20391 | 7.64190 | 0.00570 | 0.08797 |
| ADP08789     | -5.47762 | 6.86021 | 7.64011 | 0.00571 | 0.08797 |
| NP_001008648 | -5.47762 | 6.86021 | 7.64011 | 0.00571 | 0.08797 |
| NP_573311    | -5.47762 | 6.86021 | 7.64011 | 0.00571 | 0.08797 |
| XP_001375787 | -5.47762 | 6.86021 | 7.64011 | 0.00571 | 0.08797 |
| XP_001631865 | -5.47762 | 6.86021 | 7.64011 | 0.00571 | 0.08797 |
| XP_002115969 | -5.47762 | 6.86021 | 7.64011 | 0.00571 | 0.08797 |
| XP_002400122 | -5.47762 | 6.86021 | 7.64011 | 0.00571 | 0.08797 |
| XP_002596547 | -5.47762 | 6.86021 | 7.64011 | 0.00571 | 0.08797 |
| XP_002732306 | -5.47762 | 6.86021 | 7.64011 | 0.00571 | 0.08797 |

|              |          |         |         |         |         |
|--------------|----------|---------|---------|---------|---------|
| XP_002735833 | -5.47762 | 6.86021 | 7.64011 | 0.00571 | 0.08797 |
| XP_002740846 | -5.47762 | 6.86021 | 7.64011 | 0.00571 | 0.08797 |
| XP_003729354 | -5.47762 | 6.86021 | 7.64011 | 0.00571 | 0.08797 |
| XP_783928    | -5.47762 | 6.86021 | 7.64011 | 0.00571 | 0.08797 |
| XP_787226    | -5.47762 | 6.86021 | 7.64011 | 0.00571 | 0.08797 |
| XP_970879    | -5.47762 | 6.86021 | 7.64011 | 0.00571 | 0.08797 |
| XP_002414754 | -5.27902 | 7.50853 | 7.60378 | 0.00582 | 0.08797 |
| 1N0R_A       | 5.51324  | 7.18391 | 7.59510 | 0.00585 | 0.08797 |
| AAF75839     | 5.51324  | 7.18391 | 7.59510 | 0.00585 | 0.08797 |
| XP_002577332 | 5.51324  | 7.18391 | 7.59510 | 0.00585 | 0.08797 |
| XP_002943235 | 5.51324  | 7.18391 | 7.59510 | 0.00585 | 0.08797 |
| XP_395916    | 5.51324  | 7.18391 | 7.59510 | 0.00585 | 0.08797 |
| AAH07747     | -5.44536 | 6.82814 | 7.56554 | 0.00595 | 0.08797 |
| ABF21059     | -5.44536 | 6.82814 | 7.56554 | 0.00595 | 0.08797 |
| AEO35704     | -5.44536 | 6.82814 | 7.56554 | 0.00595 | 0.08797 |
| CAB38180     | -5.44536 | 6.82814 | 7.56554 | 0.00595 | 0.08797 |
| EFX88686     | -5.44536 | 6.82814 | 7.56554 | 0.00595 | 0.08797 |
| EGI62678     | -5.44536 | 6.82814 | 7.56554 | 0.00595 | 0.08797 |
| EHB15871     | -5.44536 | 6.82814 | 7.56554 | 0.00595 | 0.08797 |
| NP_001072224 | -5.44536 | 6.82814 | 7.56554 | 0.00595 | 0.08797 |
| NP_001171814 | -5.44536 | 6.82814 | 7.56554 | 0.00595 | 0.08797 |
| XP_001013132 | -5.44536 | 6.82814 | 7.56554 | 0.00595 | 0.08797 |
| XP_001663322 | -5.44536 | 6.82814 | 7.56554 | 0.00595 | 0.08797 |
| XP_001914755 | -5.44536 | 6.82814 | 7.56554 | 0.00595 | 0.08797 |
| XP_002078082 | -5.44536 | 6.82814 | 7.56554 | 0.00595 | 0.08797 |
| XP_002427810 | -5.44536 | 6.82814 | 7.56554 | 0.00595 | 0.08797 |
| XP_002431913 | -5.44536 | 6.82814 | 7.56554 | 0.00595 | 0.08797 |
| XP_002603723 | -5.44536 | 6.82814 | 7.56554 | 0.00595 | 0.08797 |
| XP_002609740 | -5.44536 | 6.82814 | 7.56554 | 0.00595 | 0.08797 |
| XP_002613805 | -5.44536 | 6.82814 | 7.56554 | 0.00595 | 0.08797 |
| XP_002614074 | -5.44536 | 6.82814 | 7.56554 | 0.00595 | 0.08797 |
| XP_002732563 | -5.44536 | 6.82814 | 7.56554 | 0.00595 | 0.08797 |
| XP_002734654 | -5.44536 | 6.82814 | 7.56554 | 0.00595 | 0.08797 |
| XP_002738314 | -5.44536 | 6.82814 | 7.56554 | 0.00595 | 0.08797 |
| XP_002739885 | -5.44536 | 6.82814 | 7.56554 | 0.00595 | 0.08797 |
| XP_002831832 | -5.44536 | 6.82814 | 7.56554 | 0.00595 | 0.08797 |
| XP_003389851 | -5.44536 | 6.82814 | 7.56554 | 0.00595 | 0.08797 |
| XP_003437908 | -5.44536 | 6.82814 | 7.56554 | 0.00595 | 0.08797 |
| XP_003490045 | -5.44536 | 6.82814 | 7.56554 | 0.00595 | 0.08797 |
| XP_003494875 | -5.44536 | 6.82814 | 7.56554 | 0.00595 | 0.08797 |
| XP_003727446 | -5.44536 | 6.82814 | 7.56554 | 0.00595 | 0.08797 |
| XP_417571    | -5.44536 | 6.82814 | 7.56554 | 0.00595 | 0.08797 |
| ZP_09965478  | -5.44536 | 6.82814 | 7.56554 | 0.00595 | 0.08797 |
| EFX86378     | 5.49256  | 7.16363 | 7.54769 | 0.00601 | 0.08806 |

|              |          |         |         |         |         |
|--------------|----------|---------|---------|---------|---------|
| XP_001379766 | 5.49256  | 7.16363 | 7.54769 | 0.00601 | 0.08806 |
| XP_002736138 | 5.49256  | 7.16363 | 7.54769 | 0.00601 | 0.08806 |
| XP_003445167 | 5.49256  | 7.16363 | 7.54769 | 0.00601 | 0.08806 |
| XP_003731784 | 5.49256  | 7.16363 | 7.54769 | 0.00601 | 0.08806 |
| XP_319948    | 5.49256  | 7.16363 | 7.54769 | 0.00601 | 0.08806 |
| XP_675648    | 5.49256  | 7.16363 | 7.54769 | 0.00601 | 0.08806 |
| XP_002731452 | -5.23733 | 7.46747 | 7.50711 | 0.00615 | 0.08840 |
| AAH42646     | 5.47159  | 7.14306 | 7.49964 | 0.00617 | 0.08840 |
| XP_001629191 | 5.47159  | 7.14306 | 7.49964 | 0.00617 | 0.08840 |
| XP_001657105 | 5.47159  | 7.14306 | 7.49964 | 0.00617 | 0.08840 |
| XP_002732972 | 5.47159  | 7.14306 | 7.49964 | 0.00617 | 0.08840 |
| XP_003216403 | 5.47159  | 7.14306 | 7.49964 | 0.00617 | 0.08840 |
| XP_003503117 | 5.47159  | 7.14306 | 7.49964 | 0.00617 | 0.08840 |
| AAH76415     | -5.41236 | 6.79534 | 7.48938 | 0.00621 | 0.08840 |
| BAE79743     | -5.41236 | 6.79534 | 7.48938 | 0.00621 | 0.08840 |
| EFZ21157     | -5.41236 | 6.79534 | 7.48938 | 0.00621 | 0.08840 |
| P86856       | -5.41236 | 6.79534 | 7.48938 | 0.00621 | 0.08840 |
| Q86MA7       | -5.41236 | 6.79534 | 7.48938 | 0.00621 | 0.08840 |
| XP_001622679 | -5.41236 | 6.79534 | 7.48938 | 0.00621 | 0.08840 |
| XP_001638741 | -5.41236 | 6.79534 | 7.48938 | 0.00621 | 0.08840 |
| XP_001639688 | -5.41236 | 6.79534 | 7.48938 | 0.00621 | 0.08840 |
| XP_002607271 | -5.41236 | 6.79534 | 7.48938 | 0.00621 | 0.08840 |
| XP_003730972 | -5.41236 | 6.79534 | 7.48938 | 0.00621 | 0.08840 |
| XP_003731756 | -5.41236 | 6.79534 | 7.48938 | 0.00621 | 0.08840 |
| XP_312357    | -5.41236 | 6.79534 | 7.48938 | 0.00621 | 0.08840 |
| XP_781600    | -5.41236 | 6.79534 | 7.48938 | 0.00621 | 0.08840 |
| XP_790269    | -5.41236 | 6.79534 | 7.48938 | 0.00621 | 0.08840 |
| XP_793314    | -5.41236 | 6.79534 | 7.48938 | 0.00621 | 0.08840 |
| YP_004894149 | -5.41236 | 6.79534 | 7.48938 | 0.00621 | 0.08840 |
| CAX13385     | 5.45030  | 7.12219 | 7.45094 | 0.00634 | 0.08911 |
| CCD77454     | 5.45030  | 7.12219 | 7.45094 | 0.00634 | 0.08911 |
| EFN63056     | 5.45030  | 7.12219 | 7.45094 | 0.00634 | 0.08911 |
| NP_001158362 | 5.45030  | 7.12219 | 7.45094 | 0.00634 | 0.08911 |
| XP_002603103 | 5.45030  | 7.12219 | 7.45094 | 0.00634 | 0.08911 |
| XP_002608536 | 5.45030  | 7.12219 | 7.45094 | 0.00634 | 0.08911 |
| XP_002751314 | 5.45030  | 7.12219 | 7.45094 | 0.00634 | 0.08911 |
| XP_003240425 | 5.45030  | 7.12219 | 7.45094 | 0.00634 | 0.08911 |
| XP_785648    | 5.45030  | 7.12219 | 7.45094 | 0.00634 | 0.08911 |
| ZP_04532941  | 5.45030  | 7.12219 | 7.45094 | 0.00634 | 0.08911 |
| ZP_08102074  | 5.45030  | 7.12219 | 7.45094 | 0.00634 | 0.08911 |
| XP_002426989 | -5.11568 | 7.87796 | 7.41962 | 0.00645 | 0.08935 |
| BAB27697     | -5.37858 | 6.76178 | 7.41158 | 0.00648 | 0.08935 |
| BAH12781     | -5.37858 | 6.76178 | 7.41158 | 0.00648 | 0.08935 |
| BAJ24842     | -5.37858 | 6.76178 | 7.41158 | 0.00648 | 0.08935 |

|              |          |         |         |         |         |
|--------------|----------|---------|---------|---------|---------|
| DAA34668     | -5.37858 | 6.76178 | 7.41158 | 0.00648 | 0.08935 |
| H2A0M0       | -5.37858 | 6.76178 | 7.41158 | 0.00648 | 0.08935 |
| NP_001121513 | -5.37858 | 6.76178 | 7.41158 | 0.00648 | 0.08935 |
| NP_724543    | -5.37858 | 6.76178 | 7.41158 | 0.00648 | 0.08935 |
| XP_001491293 | -5.37858 | 6.76178 | 7.41158 | 0.00648 | 0.08935 |
| XP_002416006 | -5.37858 | 6.76178 | 7.41158 | 0.00648 | 0.08935 |
| XP_002586063 | -5.37858 | 6.76178 | 7.41158 | 0.00648 | 0.08935 |
| XP_002605569 | -5.37858 | 6.76178 | 7.41158 | 0.00648 | 0.08935 |
| XP_002739909 | -5.37858 | 6.76178 | 7.41158 | 0.00648 | 0.08935 |
| XP_003724122 | -5.37858 | 6.76178 | 7.41158 | 0.00648 | 0.08935 |
| XP_796961    | -5.37858 | 6.76178 | 7.41158 | 0.00648 | 0.08935 |
| ABJ97377     | 5.42869  | 7.10102 | 7.40157 | 0.00652 | 0.08935 |
| CAI11834     | 5.42869  | 7.10102 | 7.40157 | 0.00652 | 0.08935 |
| NP_001128543 | 5.42869  | 7.10102 | 7.40157 | 0.00652 | 0.08935 |
| XP_002604515 | 5.42869  | 7.10102 | 7.40157 | 0.00652 | 0.08935 |
| XP_796030    | 5.42869  | 7.10102 | 7.40157 | 0.00652 | 0.08935 |
| AFC98245     | -5.05924 | 8.20967 | 7.40096 | 0.00652 | 0.08935 |
| XP_002741846 | 5.40676  | 7.07953 | 7.35151 | 0.00670 | 0.09092 |
| XP_003382559 | 5.40676  | 7.07953 | 7.35151 | 0.00670 | 0.09092 |
| XP_003440100 | 5.40676  | 7.07953 | 7.35151 | 0.00670 | 0.09092 |
| XP_003727967 | 5.40676  | 7.07953 | 7.35151 | 0.00670 | 0.09092 |
| AAC46490     | -5.34400 | 6.72743 | 7.33207 | 0.00677 | 0.09092 |
| AEO34511     | -5.34400 | 6.72743 | 7.33207 | 0.00677 | 0.09092 |
| BAF63789     | -5.34400 | 6.72743 | 7.33207 | 0.00677 | 0.09092 |
| EGI70977     | -5.34400 | 6.72743 | 7.33207 | 0.00677 | 0.09092 |
| NP_001191639 | -5.34400 | 6.72743 | 7.33207 | 0.00677 | 0.09092 |
| XP_002130339 | -5.34400 | 6.72743 | 7.33207 | 0.00677 | 0.09092 |
| XP_002131378 | -5.34400 | 6.72743 | 7.33207 | 0.00677 | 0.09092 |
| XP_002601230 | -5.34400 | 6.72743 | 7.33207 | 0.00677 | 0.09092 |
| XP_002733462 | -5.34400 | 6.72743 | 7.33207 | 0.00677 | 0.09092 |
| XP_002738807 | -5.34400 | 6.72743 | 7.33207 | 0.00677 | 0.09092 |
| XP_002989592 | -5.34400 | 6.72743 | 7.33207 | 0.00677 | 0.09092 |
| XP_003244885 | -5.34400 | 6.72743 | 7.33207 | 0.00677 | 0.09092 |
| XP_414938    | -5.34400 | 6.72743 | 7.33207 | 0.00677 | 0.09092 |
| XP_800759    | -5.34400 | 6.72743 | 7.33207 | 0.00677 | 0.09092 |
| AAI61240     | 5.38449  | 7.05772 | 7.30075 | 0.00689 | 0.09177 |
| BAH84829     | 5.38449  | 7.05772 | 7.30075 | 0.00689 | 0.09177 |
| EFN81652     | 5.38449  | 7.05772 | 7.30075 | 0.00689 | 0.09177 |
| XP_002128280 | 5.38449  | 7.05772 | 7.30075 | 0.00689 | 0.09177 |
| XP_002319013 | 5.38449  | 7.05772 | 7.30075 | 0.00689 | 0.09177 |
| XP_002427237 | 5.38449  | 7.05772 | 7.30075 | 0.00689 | 0.09177 |
| XP_317010    | 5.38449  | 7.05772 | 7.30075 | 0.00689 | 0.09177 |
| XP_002607353 | 4.94504  | 9.19652 | 7.27924 | 0.00698 | 0.09192 |
| AAD12246     | -5.30857 | 6.69223 | 7.25075 | 0.00709 | 0.09192 |

|              |          |         |         |         |         |
|--------------|----------|---------|---------|---------|---------|
| AAH08328     | -5.30857 | 6.69223 | 7.25075 | 0.00709 | 0.09192 |
| AFE74132     | -5.30857 | 6.69223 | 7.25075 | 0.00709 | 0.09192 |
| EFB18688     | -5.30857 | 6.69223 | 7.25075 | 0.00709 | 0.09192 |
| JC8022       | -5.30857 | 6.69223 | 7.25075 | 0.00709 | 0.09192 |
| NP_001139570 | -5.30857 | 6.69223 | 7.25075 | 0.00709 | 0.09192 |
| NP_001242994 | -5.30857 | 6.69223 | 7.25075 | 0.00709 | 0.09192 |
| XP_001363658 | -5.30857 | 6.69223 | 7.25075 | 0.00709 | 0.09192 |
| XP_002187407 | -5.30857 | 6.69223 | 7.25075 | 0.00709 | 0.09192 |
| XP_002595765 | -5.30857 | 6.69223 | 7.25075 | 0.00709 | 0.09192 |
| XP_002595800 | -5.30857 | 6.69223 | 7.25075 | 0.00709 | 0.09192 |
| XP_002718217 | -5.30857 | 6.69223 | 7.25075 | 0.00709 | 0.09192 |
| XP_002731212 | -5.30857 | 6.69223 | 7.25075 | 0.00709 | 0.09192 |
| XP_003453111 | -5.30857 | 6.69223 | 7.25075 | 0.00709 | 0.09192 |
| XP_787033    | -5.30857 | 6.69223 | 7.25075 | 0.00709 | 0.09192 |
| XP_795044    | -5.30857 | 6.69223 | 7.25075 | 0.00709 | 0.09192 |
| XP_968982    | -5.30857 | 6.69223 | 7.25075 | 0.00709 | 0.09192 |
| XP_969067    | -5.30857 | 6.69223 | 7.25075 | 0.00709 | 0.09192 |
| YP_629985    | -5.30857 | 6.69223 | 7.25075 | 0.00709 | 0.09192 |
| ZP_01453154  | -5.30857 | 6.69223 | 7.25075 | 0.00709 | 0.09192 |
| CAA69658     | 5.36187  | 7.03557 | 7.24926 | 0.00709 | 0.09192 |
| XP_002938053 | 5.36187  | 7.03557 | 7.24926 | 0.00709 | 0.09192 |
| XP_003345830 | 5.36187  | 7.03557 | 7.24926 | 0.00709 | 0.09192 |
| AAV85465     | 4.97062  | 8.75321 | 7.24129 | 0.00712 | 0.09222 |
| AAC35953     | -4.94694 | 8.40500 | 7.21406 | 0.00723 | 0.09309 |
| AAH81274     | 5.33889  | 7.01307 | 7.19702 | 0.00730 | 0.09309 |
| XP_002578551 | 5.33889  | 7.01307 | 7.19702 | 0.00730 | 0.09309 |
| XP_002589335 | 5.33889  | 7.01307 | 7.19702 | 0.00730 | 0.09309 |
| XP_002590403 | 5.33889  | 7.01307 | 7.19702 | 0.00730 | 0.09309 |
| XP_002607686 | 5.33889  | 7.01307 | 7.19702 | 0.00730 | 0.09309 |
| XP_002919141 | 5.33889  | 7.01307 | 7.19702 | 0.00730 | 0.09309 |
| XP_003494521 | 5.33889  | 7.01307 | 7.19702 | 0.00730 | 0.09309 |
| XP_003723431 | 5.33889  | 7.01307 | 7.19702 | 0.00730 | 0.09309 |
| XP_003725724 | 5.33889  | 7.01307 | 7.19702 | 0.00730 | 0.09309 |
| ACU83221     | -5.27225 | 6.65616 | 7.16756 | 0.00742 | 0.09309 |
| AEG78368     | -5.27225 | 6.65616 | 7.16756 | 0.00742 | 0.09309 |
| AEO32292     | -5.27225 | 6.65616 | 7.16756 | 0.00742 | 0.09309 |
| BAH14572     | -5.27225 | 6.65616 | 7.16756 | 0.00742 | 0.09309 |
| CAC82191     | -5.27225 | 6.65616 | 7.16756 | 0.00742 | 0.09309 |
| EAW68433     | -5.27225 | 6.65616 | 7.16756 | 0.00742 | 0.09309 |
| EFX84014     | -5.27225 | 6.65616 | 7.16756 | 0.00742 | 0.09309 |
| EFZ15737     | -5.27225 | 6.65616 | 7.16756 | 0.00742 | 0.09309 |
| NP_001134210 | -5.27225 | 6.65616 | 7.16756 | 0.00742 | 0.09309 |
| XP_001627242 | -5.27225 | 6.65616 | 7.16756 | 0.00742 | 0.09309 |
| XP_002109086 | -5.27225 | 6.65616 | 7.16756 | 0.00742 | 0.09309 |

|              |          |         |         |         |         |
|--------------|----------|---------|---------|---------|---------|
| XP_002131963 | -5.27225 | 6.65616 | 7.16756 | 0.00742 | 0.09309 |
| XP_002590806 | -5.27225 | 6.65616 | 7.16756 | 0.00742 | 0.09309 |
| XP_002735979 | -5.27225 | 6.65616 | 7.16756 | 0.00742 | 0.09309 |
| XP_002738454 | -5.27225 | 6.65616 | 7.16756 | 0.00742 | 0.09309 |
| XP_003729203 | -5.27225 | 6.65616 | 7.16756 | 0.00742 | 0.09309 |
| XP_003742214 | -5.27225 | 6.65616 | 7.16756 | 0.00742 | 0.09309 |
| XP_793154    | -5.27225 | 6.65616 | 7.16756 | 0.00742 | 0.09309 |
| ZP_09232839  | -5.27225 | 6.65616 | 7.16756 | 0.00742 | 0.09309 |
| XP_002609800 | -5.08115 | 7.31380 | 7.14676 | 0.00751 | 0.09331 |
| BAC34619     | 5.31554  | 6.99022 | 7.14402 | 0.00752 | 0.09331 |
| XP_001021944 | 5.31554  | 6.99022 | 7.14402 | 0.00752 | 0.09331 |
| XP_002196829 | 5.31554  | 6.99022 | 7.14402 | 0.00752 | 0.09331 |
| XP_002595898 | 5.31554  | 6.99022 | 7.14402 | 0.00752 | 0.09331 |
| XP_002738406 | 5.31554  | 6.99022 | 7.14402 | 0.00752 | 0.09331 |
| XP_002741442 | 5.31554  | 6.99022 | 7.14402 | 0.00752 | 0.09331 |
| XP_003515270 | 5.31554  | 6.99022 | 7.14402 | 0.00752 | 0.09331 |
| XP_003726678 | 5.31554  | 6.99022 | 7.14402 | 0.00752 | 0.09331 |
| XP_396524    | 5.31554  | 6.99022 | 7.14402 | 0.00752 | 0.09331 |
| AAI05210     | 5.29180  | 6.96700 | 7.09022 | 0.00775 | 0.09358 |
| EDL09901     | 5.29180  | 6.96700 | 7.09022 | 0.00775 | 0.09358 |
| EHJ78503     | 5.29180  | 6.96700 | 7.09022 | 0.00775 | 0.09358 |
| XP_002733315 | 5.29180  | 6.96700 | 7.09022 | 0.00775 | 0.09358 |
| XP_002737235 | 5.29180  | 6.96700 | 7.09022 | 0.00775 | 0.09358 |
| XP_002741523 | 5.29180  | 6.96700 | 7.09022 | 0.00775 | 0.09358 |
| XP_003219674 | 5.29180  | 6.96700 | 7.09022 | 0.00775 | 0.09358 |
| XP_003440255 | 5.29180  | 6.96700 | 7.09022 | 0.00775 | 0.09358 |
| XP_623578    | 5.29180  | 6.96700 | 7.09022 | 0.00775 | 0.09358 |
| XP_625002    | 5.29180  | 6.96700 | 7.09022 | 0.00775 | 0.09358 |
| ADQ43243     | -5.23499 | 6.61917 | 7.08240 | 0.00778 | 0.09358 |
| BAH70506     | -5.23499 | 6.61917 | 7.08240 | 0.00778 | 0.09358 |
| BAM17961     | -5.23499 | 6.61917 | 7.08240 | 0.00778 | 0.09358 |
| C3YWU0       | -5.23499 | 6.61917 | 7.08240 | 0.00778 | 0.09358 |
| CAJ38815     | -5.23499 | 6.61917 | 7.08240 | 0.00778 | 0.09358 |
| EFX84334     | -5.23499 | 6.61917 | 7.08240 | 0.00778 | 0.09358 |
| NP_001079840 | -5.23499 | 6.61917 | 7.08240 | 0.00778 | 0.09358 |
| XP_002081583 | -5.23499 | 6.61917 | 7.08240 | 0.00778 | 0.09358 |
| XP_002167634 | -5.23499 | 6.61917 | 7.08240 | 0.00778 | 0.09358 |
| XP_002410016 | -5.23499 | 6.61917 | 7.08240 | 0.00778 | 0.09358 |
| XP_002611888 | -5.23499 | 6.61917 | 7.08240 | 0.00778 | 0.09358 |
| XP_002716385 | -5.23499 | 6.61917 | 7.08240 | 0.00778 | 0.09358 |
| XP_002732810 | -5.23499 | 6.61917 | 7.08240 | 0.00778 | 0.09358 |
| XP_002741428 | -5.23499 | 6.61917 | 7.08240 | 0.00778 | 0.09358 |
| XP_002904935 | -5.23499 | 6.61917 | 7.08240 | 0.00778 | 0.09358 |
| XP_003284143 | -5.23499 | 6.61917 | 7.08240 | 0.00778 | 0.09358 |

|              |          |         |         |         |         |
|--------------|----------|---------|---------|---------|---------|
| XP_003447492 | -5.23499 | 6.61917 | 7.08240 | 0.00778 | 0.09358 |
| XP_003455212 | -5.23499 | 6.61917 | 7.08240 | 0.00778 | 0.09358 |
| XP_644124    | -5.23499 | 6.61917 | 7.08240 | 0.00778 | 0.09358 |
| XP_728306    | -5.23499 | 6.61917 | 7.08240 | 0.00778 | 0.09358 |
| AAH23438     | 5.26766  | 6.94340 | 7.03560 | 0.00799 | 0.09459 |
| CAD79439     | 5.26766  | 6.94340 | 7.03560 | 0.00799 | 0.09459 |
| NP_001028276 | 5.26766  | 6.94340 | 7.03560 | 0.00799 | 0.09459 |
| XP_002121377 | 5.26766  | 6.94340 | 7.03560 | 0.00799 | 0.09459 |
| XP_002603744 | 5.26766  | 6.94340 | 7.03560 | 0.00799 | 0.09459 |
| XP_002922184 | 5.26766  | 6.94340 | 7.03560 | 0.00799 | 0.09459 |
| XP_003704775 | 5.26766  | 6.94340 | 7.03560 | 0.00799 | 0.09459 |
| ACO09839     | -5.19674 | 6.58120 | 6.99518 | 0.00817 | 0.09459 |
| ADI78068     | -5.19674 | 6.58120 | 6.99518 | 0.00817 | 0.09459 |
| AES07133     | -5.19674 | 6.58120 | 6.99518 | 0.00817 | 0.09459 |
| BAK52806     | -5.19674 | 6.58120 | 6.99518 | 0.00817 | 0.09459 |
| BAK61936     | -5.19674 | 6.58120 | 6.99518 | 0.00817 | 0.09459 |
| BAM20344     | -5.19674 | 6.58120 | 6.99518 | 0.00817 | 0.09459 |
| EFN86147     | -5.19674 | 6.58120 | 6.99518 | 0.00817 | 0.09459 |
| EGT46744     | -5.19674 | 6.58120 | 6.99518 | 0.00817 | 0.09459 |
| EGU89445     | -5.19674 | 6.58120 | 6.99518 | 0.00817 | 0.09459 |
| NP_001120175 | -5.19674 | 6.58120 | 6.99518 | 0.00817 | 0.09459 |
| NP_001161644 | -5.19674 | 6.58120 | 6.99518 | 0.00817 | 0.09459 |
| NP_001187438 | -5.19674 | 6.58120 | 6.99518 | 0.00817 | 0.09459 |
| XP_001634032 | -5.19674 | 6.58120 | 6.99518 | 0.00817 | 0.09459 |
| XP_002596805 | -5.19674 | 6.58120 | 6.99518 | 0.00817 | 0.09459 |
| XP_002605354 | -5.19674 | 6.58120 | 6.99518 | 0.00817 | 0.09459 |
| XP_002609809 | -5.19674 | 6.58120 | 6.99518 | 0.00817 | 0.09459 |
| XP_002610578 | -5.19674 | 6.58120 | 6.99518 | 0.00817 | 0.09459 |
| XP_002611948 | -5.19674 | 6.58120 | 6.99518 | 0.00817 | 0.09459 |
| XP_002736837 | -5.19674 | 6.58120 | 6.99518 | 0.00817 | 0.09459 |
| XP_002737332 | -5.19674 | 6.58120 | 6.99518 | 0.00817 | 0.09459 |
| XP_002742014 | -5.19674 | 6.58120 | 6.99518 | 0.00817 | 0.09459 |
| XP_002918754 | -5.19674 | 6.58120 | 6.99518 | 0.00817 | 0.09459 |
| XP_003383371 | -5.19674 | 6.58120 | 6.99518 | 0.00817 | 0.09459 |
| XP_003706967 | -5.19674 | 6.58120 | 6.99518 | 0.00817 | 0.09459 |
| XP_003728329 | -5.19674 | 6.58120 | 6.99518 | 0.00817 | 0.09459 |
| XP_652421    | -5.19674 | 6.58120 | 6.99518 | 0.00817 | 0.09459 |
| XP_788973    | -5.19674 | 6.58120 | 6.99518 | 0.00817 | 0.09459 |
| XP_797784    | -5.19674 | 6.58120 | 6.99518 | 0.00817 | 0.09459 |
| AAF08010     | 5.24312  | 6.91940 | 6.98014 | 0.00824 | 0.09459 |
| AAI30064     | 5.24312  | 6.91940 | 6.98014 | 0.00824 | 0.09459 |
| ABN58714     | 5.24312  | 6.91940 | 6.98014 | 0.00824 | 0.09459 |
| EHB18107     | 5.24312  | 6.91940 | 6.98014 | 0.00824 | 0.09459 |
| NP_001096464 | 5.24312  | 6.91940 | 6.98014 | 0.00824 | 0.09459 |

|              |          |         |         |         |         |
|--------------|----------|---------|---------|---------|---------|
| XP_001630804 | 5.24312  | 6.91940 | 6.98014 | 0.00824 | 0.09459 |
| XP_001638183 | 5.24312  | 6.91940 | 6.98014 | 0.00824 | 0.09459 |
| XP_002427605 | 5.24312  | 6.91940 | 6.98014 | 0.00824 | 0.09459 |
| XP_002732982 | 5.24312  | 6.91940 | 6.98014 | 0.00824 | 0.09459 |
| XP_002741356 | 5.24312  | 6.91940 | 6.98014 | 0.00824 | 0.09459 |
| XP_003706024 | 5.24312  | 6.91940 | 6.98014 | 0.00824 | 0.09459 |
| EFN77118     | -4.90977 | 7.67650 | 6.94526 | 0.00840 | 0.09504 |
| AEF33431     | 5.21815  | 6.89500 | 6.92381 | 0.00851 | 0.09504 |
| EGZ11335     | 5.21815  | 6.89500 | 6.92381 | 0.00851 | 0.09504 |
| XP_002169156 | 5.21815  | 6.89500 | 6.92381 | 0.00851 | 0.09504 |
| XP_002423593 | 5.21815  | 6.89500 | 6.92381 | 0.00851 | 0.09504 |
| XP_002427334 | 5.21815  | 6.89500 | 6.92381 | 0.00851 | 0.09504 |
| XP_002603725 | 5.21815  | 6.89500 | 6.92381 | 0.00851 | 0.09504 |
| XP_002609157 | 5.21815  | 6.89500 | 6.92381 | 0.00851 | 0.09504 |
| XP_002612048 | 5.21815  | 6.89500 | 6.92381 | 0.00851 | 0.09504 |
| XP_002737647 | 5.21815  | 6.89500 | 6.92381 | 0.00851 | 0.09504 |
| XP_003199942 | 5.21815  | 6.89500 | 6.92381 | 0.00851 | 0.09504 |
| XP_003201532 | 5.21815  | 6.89500 | 6.92381 | 0.00851 | 0.09504 |
| XP_003451110 | 5.21815  | 6.89500 | 6.92381 | 0.00851 | 0.09504 |
| AAB94002     | -5.15745 | 6.54221 | 6.90580 | 0.00859 | 0.09504 |
| AAX59986     | -5.15745 | 6.54221 | 6.90580 | 0.00859 | 0.09504 |
| CAA03852     | -5.15745 | 6.54221 | 6.90580 | 0.00859 | 0.09504 |
| CAH72156     | -5.15745 | 6.54221 | 6.90580 | 0.00859 | 0.09504 |
| CAM16369     | -5.15745 | 6.54221 | 6.90580 | 0.00859 | 0.09504 |
| CCC90229     | -5.15745 | 6.54221 | 6.90580 | 0.00859 | 0.09504 |
| EAW92073     | -5.15745 | 6.54221 | 6.90580 | 0.00859 | 0.09504 |
| EHB01690     | -5.15745 | 6.54221 | 6.90580 | 0.00859 | 0.09504 |
| XP_001073612 | -5.15745 | 6.54221 | 6.90580 | 0.00859 | 0.09504 |
| XP_001370030 | -5.15745 | 6.54221 | 6.90580 | 0.00859 | 0.09504 |
| XP_001622790 | -5.15745 | 6.54221 | 6.90580 | 0.00859 | 0.09504 |
| XP_001730439 | -5.15745 | 6.54221 | 6.90580 | 0.00859 | 0.09504 |
| XP_002121304 | -5.15745 | 6.54221 | 6.90580 | 0.00859 | 0.09504 |
| XP_002594115 | -5.15745 | 6.54221 | 6.90580 | 0.00859 | 0.09504 |
| XP_002594726 | -5.15745 | 6.54221 | 6.90580 | 0.00859 | 0.09504 |
| XP_002599337 | -5.15745 | 6.54221 | 6.90580 | 0.00859 | 0.09504 |
| XP_002606340 | -5.15745 | 6.54221 | 6.90580 | 0.00859 | 0.09504 |
| XP_002606484 | -5.15745 | 6.54221 | 6.90580 | 0.00859 | 0.09504 |
| XP_002606952 | -5.15745 | 6.54221 | 6.90580 | 0.00859 | 0.09504 |
| XP_002607276 | -5.15745 | 6.54221 | 6.90580 | 0.00859 | 0.09504 |
| XP_002613830 | -5.15745 | 6.54221 | 6.90580 | 0.00859 | 0.09504 |
| XP_002737170 | -5.15745 | 6.54221 | 6.90580 | 0.00859 | 0.09504 |
| XP_002740120 | -5.15745 | 6.54221 | 6.90580 | 0.00859 | 0.09504 |
| XP_003459606 | -5.15745 | 6.54221 | 6.90580 | 0.00859 | 0.09504 |
| XP_003743136 | -5.15745 | 6.54221 | 6.90580 | 0.00859 | 0.09504 |

|              |          |         |         |         |         |
|--------------|----------|---------|---------|---------|---------|
| AAM12624     | 5.19274  | 6.87018 | 6.86659 | 0.00878 | 0.09607 |
| ABF18435     | 5.19274  | 6.87018 | 6.86659 | 0.00878 | 0.09607 |
| BAI78310     | 5.19274  | 6.87018 | 6.86659 | 0.00878 | 0.09607 |
| XP_001655365 | 5.19274  | 6.87018 | 6.86659 | 0.00878 | 0.09607 |
| XP_001917505 | 5.19274  | 6.87018 | 6.86659 | 0.00878 | 0.09607 |
| XP_002597495 | 5.19274  | 6.87018 | 6.86659 | 0.00878 | 0.09607 |
| XP_002603507 | 5.19274  | 6.87018 | 6.86659 | 0.00878 | 0.09607 |
| XP_700884    | 5.19274  | 6.87018 | 6.86659 | 0.00878 | 0.09607 |
| XP_002735254 | -4.82453 | 7.98076 | 6.86034 | 0.00881 | 0.09607 |
| XP_003704588 | -4.82453 | 7.98076 | 6.86034 | 0.00881 | 0.09607 |
| AAN71247     | -5.11706 | 6.50214 | 6.81414 | 0.00904 | 0.09607 |
| AAO16597     | -5.11706 | 6.50214 | 6.81414 | 0.00904 | 0.09607 |
| ABJ17046     | -5.11706 | 6.50214 | 6.81414 | 0.00904 | 0.09607 |
| ABZ04225     | -5.11706 | 6.50214 | 6.81414 | 0.00904 | 0.09607 |
| ACN25141     | -5.11706 | 6.50214 | 6.81414 | 0.00904 | 0.09607 |
| ACY92475     | -5.11706 | 6.50214 | 6.81414 | 0.00904 | 0.09607 |
| ADY43920     | -5.11706 | 6.50214 | 6.81414 | 0.00904 | 0.09607 |
| EFN60550     | -5.11706 | 6.50214 | 6.81414 | 0.00904 | 0.09607 |
| EIM88312     | -5.11706 | 6.50214 | 6.81414 | 0.00904 | 0.09607 |
| XP_001623400 | -5.11706 | 6.50214 | 6.81414 | 0.00904 | 0.09607 |
| XP_001624183 | -5.11706 | 6.50214 | 6.81414 | 0.00904 | 0.09607 |
| XP_002191916 | -5.11706 | 6.50214 | 6.81414 | 0.00904 | 0.09607 |
| XP_002599532 | -5.11706 | 6.50214 | 6.81414 | 0.00904 | 0.09607 |
| XP_002603910 | -5.11706 | 6.50214 | 6.81414 | 0.00904 | 0.09607 |
| XP_002613713 | -5.11706 | 6.50214 | 6.81414 | 0.00904 | 0.09607 |
| XP_002730816 | -5.11706 | 6.50214 | 6.81414 | 0.00904 | 0.09607 |
| XP_002735108 | -5.11706 | 6.50214 | 6.81414 | 0.00904 | 0.09607 |
| XP_002737296 | -5.11706 | 6.50214 | 6.81414 | 0.00904 | 0.09607 |
| XP_002739880 | -5.11706 | 6.50214 | 6.81414 | 0.00904 | 0.09607 |
| XP_002740327 | -5.11706 | 6.50214 | 6.81414 | 0.00904 | 0.09607 |
| XP_002941352 | -5.11706 | 6.50214 | 6.81414 | 0.00904 | 0.09607 |
| XP_003230829 | -5.11706 | 6.50214 | 6.81414 | 0.00904 | 0.09607 |
| XP_003249185 | -5.11706 | 6.50214 | 6.81414 | 0.00904 | 0.09607 |
| XP_003377489 | -5.11706 | 6.50214 | 6.81414 | 0.00904 | 0.09607 |
| XP_003416137 | -5.11706 | 6.50214 | 6.81414 | 0.00904 | 0.09607 |
| XP_792701    | -5.11706 | 6.50214 | 6.81414 | 0.00904 | 0.09607 |
| ABK63640     | 5.16687  | 6.84493 | 6.80844 | 0.00907 | 0.09607 |
| AFA34361     | 5.16687  | 6.84493 | 6.80844 | 0.00907 | 0.09607 |
| CAF96009     | 5.16687  | 6.84493 | 6.80844 | 0.00907 | 0.09607 |
| NP_001177233 | 5.16687  | 6.84493 | 6.80844 | 0.00907 | 0.09607 |
| XP_001638576 | 5.16687  | 6.84493 | 6.80844 | 0.00907 | 0.09607 |
| XP_002118044 | 5.16687  | 6.84493 | 6.80844 | 0.00907 | 0.09607 |
| XP_002120553 | 5.16687  | 6.84493 | 6.80844 | 0.00907 | 0.09607 |
| XP_002419737 | 5.16687  | 6.84493 | 6.80844 | 0.00907 | 0.09607 |

|              |          |         |         |         |         |
|--------------|----------|---------|---------|---------|---------|
| XP_002731635 | 5.16687  | 6.84493 | 6.80844 | 0.00907 | 0.09607 |
| XP_003412872 | 5.16687  | 6.84493 | 6.80844 | 0.00907 | 0.09607 |
| XP_003443814 | 5.16687  | 6.84493 | 6.80844 | 0.00907 | 0.09607 |
| BAE36201     | 5.14054  | 6.81922 | 6.74934 | 0.00938 | 0.09740 |
| CAQ14975     | 5.14054  | 6.81922 | 6.74934 | 0.00938 | 0.09740 |
| NP_001011952 | 5.14054  | 6.81922 | 6.74934 | 0.00938 | 0.09740 |
| XP_002524490 | 5.14054  | 6.81922 | 6.74934 | 0.00938 | 0.09740 |
| XP_002586461 | 5.14054  | 6.81922 | 6.74934 | 0.00938 | 0.09740 |
| XP_002597866 | 5.14054  | 6.81922 | 6.74934 | 0.00938 | 0.09740 |
| XP_002740084 | 5.14054  | 6.81922 | 6.74934 | 0.00938 | 0.09740 |
| XP_003514888 | 5.14054  | 6.81922 | 6.74934 | 0.00938 | 0.09740 |
| AAH20198     | -5.07551 | 6.46092 | 6.72009 | 0.00953 | 0.09740 |
| AAI42797     | -5.07551 | 6.46092 | 6.72009 | 0.00953 | 0.09740 |
| AAX26856     | -5.07551 | 6.46092 | 6.72009 | 0.00953 | 0.09740 |
| AES11373     | -5.07551 | 6.46092 | 6.72009 | 0.00953 | 0.09740 |
| BAE00688     | -5.07551 | 6.46092 | 6.72009 | 0.00953 | 0.09740 |
| CAG05170     | -5.07551 | 6.46092 | 6.72009 | 0.00953 | 0.09740 |
| CBX41740     | -5.07551 | 6.46092 | 6.72009 | 0.00953 | 0.09740 |
| DAA01766     | -5.07551 | 6.46092 | 6.72009 | 0.00953 | 0.09740 |
| EFX90172     | -5.07551 | 6.46092 | 6.72009 | 0.00953 | 0.09740 |
| P25324       | -5.07551 | 6.46092 | 6.72009 | 0.00953 | 0.09740 |
| XP_001630985 | -5.07551 | 6.46092 | 6.72009 | 0.00953 | 0.09740 |
| XP_001632595 | -5.07551 | 6.46092 | 6.72009 | 0.00953 | 0.09740 |
| XP_001648420 | -5.07551 | 6.46092 | 6.72009 | 0.00953 | 0.09740 |
| XP_001650130 | -5.07551 | 6.46092 | 6.72009 | 0.00953 | 0.09740 |
| XP_001747261 | -5.07551 | 6.46092 | 6.72009 | 0.00953 | 0.09740 |
| XP_001811118 | -5.07551 | 6.46092 | 6.72009 | 0.00953 | 0.09740 |
| XP_001901240 | -5.07551 | 6.46092 | 6.72009 | 0.00953 | 0.09740 |
| XP_002107929 | -5.07551 | 6.46092 | 6.72009 | 0.00953 | 0.09740 |
| XP_002589568 | -5.07551 | 6.46092 | 6.72009 | 0.00953 | 0.09740 |
| XP_002595454 | -5.07551 | 6.46092 | 6.72009 | 0.00953 | 0.09740 |
| XP_002599181 | -5.07551 | 6.46092 | 6.72009 | 0.00953 | 0.09740 |
| XP_002602987 | -5.07551 | 6.46092 | 6.72009 | 0.00953 | 0.09740 |
| XP_002608254 | -5.07551 | 6.46092 | 6.72009 | 0.00953 | 0.09740 |
| XP_002671735 | -5.07551 | 6.46092 | 6.72009 | 0.00953 | 0.09740 |
| XP_002708625 | -5.07551 | 6.46092 | 6.72009 | 0.00953 | 0.09740 |
| XP_002732024 | -5.07551 | 6.46092 | 6.72009 | 0.00953 | 0.09740 |
| XP_002734349 | -5.07551 | 6.46092 | 6.72009 | 0.00953 | 0.09740 |
| XP_003224930 | -5.07551 | 6.46092 | 6.72009 | 0.00953 | 0.09740 |
| XP_003486382 | -5.07551 | 6.46092 | 6.72009 | 0.00953 | 0.09740 |
| XP_003693496 | -5.07551 | 6.46092 | 6.72009 | 0.00953 | 0.09740 |
| XP_392313    | -5.07551 | 6.46092 | 6.72009 | 0.00953 | 0.09740 |
| YP_501570    | -5.07551 | 6.46092 | 6.72009 | 0.00953 | 0.09740 |
| XP_001861636 | -4.66810 | 8.95223 | 6.71439 | 0.00956 | 0.09763 |

|              |          |          |         |         |         |
|--------------|----------|----------|---------|---------|---------|
| AAH56009     | 5.11371  | 6.79305  | 6.68925 | 0.00970 | 0.09798 |
| AAS86702     | 5.11371  | 6.79305  | 6.68925 | 0.00970 | 0.09798 |
| ABR68007     | 5.11371  | 6.79305  | 6.68925 | 0.00970 | 0.09798 |
| ACL68661     | 5.11371  | 6.79305  | 6.68925 | 0.00970 | 0.09798 |
| ADU19852     | 5.11371  | 6.79305  | 6.68925 | 0.00970 | 0.09798 |
| AEF33398     | 5.11371  | 6.79305  | 6.68925 | 0.00970 | 0.09798 |
| AEO33549     | 5.11371  | 6.79305  | 6.68925 | 0.00970 | 0.09798 |
| CAX14245     | 5.11371  | 6.79305  | 6.68925 | 0.00970 | 0.09798 |
| XP_001098430 | 5.11371  | 6.79305  | 6.68925 | 0.00970 | 0.09798 |
| XP_002190622 | 5.11371  | 6.79305  | 6.68925 | 0.00970 | 0.09798 |
| XP_002585735 | 5.11371  | 6.79305  | 6.68925 | 0.00970 | 0.09798 |
| XP_002741525 | 5.11371  | 6.79305  | 6.68925 | 0.00970 | 0.09798 |
| AAL40415     | -4.59598 | 10.01389 | 6.65657 | 0.00988 | 0.09868 |
| 3ZU7_B       | 5.08637  | 6.76639  | 6.62814 | 0.01004 | 0.09868 |
| ACA53359     | 5.08637  | 6.76639  | 6.62814 | 0.01004 | 0.09868 |
| AEO34496     | 5.08637  | 6.76639  | 6.62814 | 0.01004 | 0.09868 |
| BAB24599     | 5.08637  | 6.76639  | 6.62814 | 0.01004 | 0.09868 |
| NP_001003525 | 5.08637  | 6.76639  | 6.62814 | 0.01004 | 0.09868 |
| NP_001246171 | 5.08637  | 6.76639  | 6.62814 | 0.01004 | 0.09868 |
| XP_002733177 | 5.08637  | 6.76639  | 6.62814 | 0.01004 | 0.09868 |
| XP_002735577 | 5.08637  | 6.76639  | 6.62814 | 0.01004 | 0.09868 |
| XP_003218952 | 5.08637  | 6.76639  | 6.62814 | 0.01004 | 0.09868 |
| XP_003444610 | 5.08637  | 6.76639  | 6.62814 | 0.01004 | 0.09868 |
| CAF95840     | -5.03272 | 6.41850  | 6.62353 | 0.01006 | 0.09868 |
| DAA01286     | -5.03272 | 6.41850  | 6.62353 | 0.01006 | 0.09868 |
| EFR22584     | -5.03272 | 6.41850  | 6.62353 | 0.01006 | 0.09868 |
| NP_001073476 | -5.03272 | 6.41850  | 6.62353 | 0.01006 | 0.09868 |
| NP_997822    | -5.03272 | 6.41850  | 6.62353 | 0.01006 | 0.09868 |
| XP_001381503 | -5.03272 | 6.41850  | 6.62353 | 0.01006 | 0.09868 |
| XP_001600405 | -5.03272 | 6.41850  | 6.62353 | 0.01006 | 0.09868 |
| XP_001623090 | -5.03272 | 6.41850  | 6.62353 | 0.01006 | 0.09868 |
| XP_002161139 | -5.03272 | 6.41850  | 6.62353 | 0.01006 | 0.09868 |
| XP_002422774 | -5.03272 | 6.41850  | 6.62353 | 0.01006 | 0.09868 |
| XP_002431934 | -5.03272 | 6.41850  | 6.62353 | 0.01006 | 0.09868 |
| XP_002593165 | -5.03272 | 6.41850  | 6.62353 | 0.01006 | 0.09868 |
| XP_002612124 | -5.03272 | 6.41850  | 6.62353 | 0.01006 | 0.09868 |
| XP_002730573 | -5.03272 | 6.41850  | 6.62353 | 0.01006 | 0.09868 |
| XP_002735319 | -5.03272 | 6.41850  | 6.62353 | 0.01006 | 0.09868 |
| XP_002742026 | -5.03272 | 6.41850  | 6.62353 | 0.01006 | 0.09868 |
| XP_003215978 | -5.03272 | 6.41850  | 6.62353 | 0.01006 | 0.09868 |
| XP_003227281 | -5.03272 | 6.41850  | 6.62353 | 0.01006 | 0.09868 |
| XP_003228880 | -5.03272 | 6.41850  | 6.62353 | 0.01006 | 0.09868 |
| XP_003437657 | -5.03272 | 6.41850  | 6.62353 | 0.01006 | 0.09868 |
| XP_003480569 | -5.03272 | 6.41850  | 6.62353 | 0.01006 | 0.09868 |

|              |          |         |         |         |         |
|--------------|----------|---------|---------|---------|---------|
| XP_623653    | -5.03272 | 6.41850 | 6.62353 | 0.01006 | 0.09868 |
| XP_968186    | -5.03272 | 6.41850 | 6.62353 | 0.01006 | 0.09868 |
| XP_001509166 | -4.85175 | 7.08866 | 6.62322 | 0.01007 | 0.09868 |
| AAH48199     | 5.05851  | 6.73923 | 6.56597 | 0.01039 | 0.09978 |
| EDL08506     | 5.05851  | 6.73923 | 6.56597 | 0.01039 | 0.09978 |
| EFN87015     | 5.05851  | 6.73923 | 6.56597 | 0.01039 | 0.09978 |
| EFX89628     | 5.05851  | 6.73923 | 6.56597 | 0.01039 | 0.09978 |
| EHJ77866     | 5.05851  | 6.73923 | 6.56597 | 0.01039 | 0.09978 |
| NP_001085695 | 5.05851  | 6.73923 | 6.56597 | 0.01039 | 0.09978 |
| NP_001087707 | 5.05851  | 6.73923 | 6.56597 | 0.01039 | 0.09978 |
| NP_758033    | 5.05851  | 6.73923 | 6.56597 | 0.01039 | 0.09978 |
| XP_001371296 | 5.05851  | 6.73923 | 6.56597 | 0.01039 | 0.09978 |
| XP_002076869 | 5.05851  | 6.73923 | 6.56597 | 0.01039 | 0.09978 |
| XP_002586024 | 5.05851  | 6.73923 | 6.56597 | 0.01039 | 0.09978 |
| XP_002592162 | 5.05851  | 6.73923 | 6.56597 | 0.01039 | 0.09978 |
| XP_002592437 | 5.05851  | 6.73923 | 6.56597 | 0.01039 | 0.09978 |
| XP_002600896 | 5.05851  | 6.73923 | 6.56597 | 0.01039 | 0.09978 |
| XP_002607406 | 5.05851  | 6.73923 | 6.56597 | 0.01039 | 0.09978 |
| XP_003443102 | 5.05851  | 6.73923 | 6.56597 | 0.01039 | 0.09978 |
| XP_003726012 | 5.05851  | 6.73923 | 6.56597 | 0.01039 | 0.09978 |
| XP_003746101 | 5.05851  | 6.73923 | 6.56597 | 0.01039 | 0.09978 |
| XP_782883    | 5.05851  | 6.73923 | 6.56597 | 0.01039 | 0.09978 |
| XP_787047    | 5.05851  | 6.73923 | 6.56597 | 0.01039 | 0.09978 |
| XP_003389557 | -4.82386 | 7.06133 | 6.56007 | 0.01043 | 0.09978 |
| XP_003382892 | -4.62174 | 8.55560 | 6.55695 | 0.01045 | 0.09978 |
| AAG42824     | -4.98863 | 6.37479 | 6.52430 | 0.01064 | 0.09978 |
| AAI42789     | -4.98863 | 6.37479 | 6.52430 | 0.01064 | 0.09978 |
| AAK96227     | -4.98863 | 6.37479 | 6.52430 | 0.01064 | 0.09978 |
| AAM18869     | -4.98863 | 6.37479 | 6.52430 | 0.01064 | 0.09978 |
| AAT97079     | -4.98863 | 6.37479 | 6.52430 | 0.01064 | 0.09978 |
| AAW24718     | -4.98863 | 6.37479 | 6.52430 | 0.01064 | 0.09978 |
| AEO34520     | -4.98863 | 6.37479 | 6.52430 | 0.01064 | 0.09978 |
| CAP19429     | -4.98863 | 6.37479 | 6.52430 | 0.01064 | 0.09978 |
| EAW89598     | -4.98863 | 6.37479 | 6.52430 | 0.01064 | 0.09978 |
| EGD80777     | -4.98863 | 6.37479 | 6.52430 | 0.01064 | 0.09978 |
| NP_001103594 | -4.98863 | 6.37479 | 6.52430 | 0.01064 | 0.09978 |
| NP_001177260 | -4.98863 | 6.37479 | 6.52430 | 0.01064 | 0.09978 |
| XP_001601734 | -4.98863 | 6.37479 | 6.52430 | 0.01064 | 0.09978 |
| XP_001635714 | -4.98863 | 6.37479 | 6.52430 | 0.01064 | 0.09978 |
| XP_001640621 | -4.98863 | 6.37479 | 6.52430 | 0.01064 | 0.09978 |
| XP_001659775 | -4.98863 | 6.37479 | 6.52430 | 0.01064 | 0.09978 |
| XP_001956625 | -4.98863 | 6.37479 | 6.52430 | 0.01064 | 0.09978 |
| XP_002105029 | -4.98863 | 6.37479 | 6.52430 | 0.01064 | 0.09978 |
| XP_002588214 | -4.98863 | 6.37479 | 6.52430 | 0.01064 | 0.09978 |

|              |          |         |         |         |         |
|--------------|----------|---------|---------|---------|---------|
| XP_002589790 | -4.98863 | 6.37479 | 6.52430 | 0.01064 | 0.09978 |
| XP_002593069 | -4.98863 | 6.37479 | 6.52430 | 0.01064 | 0.09978 |
| XP_002601232 | -4.98863 | 6.37479 | 6.52430 | 0.01064 | 0.09978 |
| XP_002601620 | -4.98863 | 6.37479 | 6.52430 | 0.01064 | 0.09978 |
| XP_002732898 | -4.98863 | 6.37479 | 6.52430 | 0.01064 | 0.09978 |
| XP_002738217 | -4.98863 | 6.37479 | 6.52430 | 0.01064 | 0.09978 |
| XP_002834412 | -4.98863 | 6.37479 | 6.52430 | 0.01064 | 0.09978 |
| XP_003230802 | -4.98863 | 6.37479 | 6.52430 | 0.01064 | 0.09978 |
| XP_003243638 | -4.98863 | 6.37479 | 6.52430 | 0.01064 | 0.09978 |
| XP_003384634 | -4.98863 | 6.37479 | 6.52430 | 0.01064 | 0.09978 |
| XP_003726964 | -4.98863 | 6.37479 | 6.52430 | 0.01064 | 0.09978 |
| XP_785073    | -4.98863 | 6.37479 | 6.52430 | 0.01064 | 0.09978 |
| XP_790246    | -4.98863 | 6.37479 | 6.52430 | 0.01064 | 0.09978 |
| CCD78935     | 5.03010  | 6.71154 | 6.50271 | 0.01077 | 0.09995 |
| EEE31154     | 5.03010  | 6.71154 | 6.50271 | 0.01077 | 0.09995 |
| EFZ17875     | 5.03010  | 6.71154 | 6.50271 | 0.01077 | 0.09995 |
| EGT39833     | 5.03010  | 6.71154 | 6.50271 | 0.01077 | 0.09995 |
| XP_001301665 | 5.03010  | 6.71154 | 6.50271 | 0.01077 | 0.09995 |
| XP_001438334 | 5.03010  | 6.71154 | 6.50271 | 0.01077 | 0.09995 |
| XP_001497503 | 5.03010  | 6.71154 | 6.50271 | 0.01077 | 0.09995 |
| XP_001622021 | 5.03010  | 6.71154 | 6.50271 | 0.01077 | 0.09995 |
| XP_002032980 | 5.03010  | 6.71154 | 6.50271 | 0.01077 | 0.09995 |
| XP_002608279 | 5.03010  | 6.71154 | 6.50271 | 0.01077 | 0.09995 |
| XP_002730917 | 5.03010  | 6.71154 | 6.50271 | 0.01077 | 0.09995 |
| XP_002734366 | 5.03010  | 6.71154 | 6.50271 | 0.01077 | 0.09995 |
| XP_002736788 | 5.03010  | 6.71154 | 6.50271 | 0.01077 | 0.09995 |

**Figure S4.** Gene Ontology (GO) terms with highest significance levels (Fisher's exact test) in (A) upregulated and (B) downregulated unigenes.

(A)

| GO.ID      | Term                                                                | Annotated | Significant | Expected  | classic Fisher |
|------------|---------------------------------------------------------------------|-----------|-------------|-----------|----------------|
| GO:0071695 | anatomical structure maturation                                     | 20        | 6           | 0.690000  | 0.00004        |
| GO:0007165 | signal transduction                                                 | 1395      | 75          | 48.390000 | 0.00001        |
| GO:0055085 | transmembrane transport                                             | 337       | 27          | 11.690000 | 0.00003        |
| GO:0006414 | translational elongation                                            | 145       | 16          | 5.030000  | 0.00004        |
| GO:0006614 | SRP-dependent cotranslational protein targeting to membrane         | 91        | 12          | 3.160000  | 0.00006        |
| GO:0048738 | cardiac muscle tissue development                                   | 49        | 8           | 1.700000  | 0.00024        |
| GO:0047496 | vesicle transport along microtubule                                 | 28        | 6           | 0.970000  | 0.00032        |
| GO:0010927 | cellular component assembly involved in morphogenesis               | 182       | 16          | 6.310000  | 0.00052        |
| GO:0006415 | translational termination                                           | 83        | 10          | 2.880000  | 0.00054        |
| GO:0006413 | translational initiation                                            | 156       | 14          | 5.410000  | 0.00095        |
| GO:0009207 | purine ribonucleoside triphosphate catabolic process                | 513       | 31          | 17.800000 | 0.00142        |
| GO:0042274 | ribosomal small subunit biogenesis                                  | 25        | 5           | 0.870000  | 0.00144        |
| GO:0007368 | determination of left/right symmetry                                | 81        | 9           | 2.810000  | 0.00182        |
| GO:0043270 | positive regulation of ion transport                                | 16        | 4           | 0.560000  | 0.00184        |
| GO:0031032 | actomyosin structure organization                                   | 83        | 9           | 2.880000  | 0.00216        |
| GO:0000184 | nuclear-transcribed mRNA catabolic process, nonsense-mediated decay | 100       | 10          | 3.470000  | 0.00229        |
| GO:0034470 | ncRNA processing                                                    | 101       | 10          | 3.500000  | 0.00247        |
| GO:0019083 | viral transcription                                                 | 101       | 10          | 3.500000  | 0.00247        |
| GO:0003002 | regionalization                                                     | 195       | 15          | 6.760000  | 0.00298        |
| GO:0002378 | immunoglobulin biosynthetic process                                 | 10        | 3           | 0.350000  | 0.00412        |

## (B)

| GO.ID      | Term                                                 | Annotated | Significant | Expected | classic Fisher |
|------------|------------------------------------------------------|-----------|-------------|----------|----------------|
| GO:0006338 | chromatin remodeling                                 | 78        | 13          | 5.83000  | 0.00470        |
| GO:0006333 | chromatin assembly or disassembly                    | 85        | 14          | 6.35000  | 0.00380        |
| GO:0051384 | response to glucocorticoid stimulus                  | 42        | 8           | 3.14000  | 0.01120        |
| GO:0032320 | positive regulation of Ras GTPase activity           | 28        | 6           | 2.09000  | 0.01540        |
| GO:0043954 | cellular component maintenance                       | 14        | 4           | 1.05000  | 0.01680        |
| GO:0070301 | cellular response to hydrogen peroxide               | 14        | 4           | 1.05000  | 0.01680        |
| GO:0042059 | negative regulation of epidermal growth              | 37        | 7           | 2.76000  | 0.01790        |
| GO:0045862 | positive regulation of proteolysis                   | 37        | 7           | 2.76000  | 0.01790        |
| GO:0021915 | neural tube development                              | 83        | 12          | 6.20000  | 0.01940        |
| GO:0009161 | ribonucleoside monophosphate metabolic process       | 16        | 4           | 1.20000  | 0.02720        |
| GO:0033333 | fin development                                      | 16        | 4           | 1.20000  | 0.02720        |
| GO:0032967 | positive regulation of collagen biosynthetic process | 10        | 3           | 0.75000  | 0.03340        |
| GO:0035329 | hippo signaling cascade                              | 10        | 3           | 0.75000  | 0.03340        |
| GO:0050686 | negative regulation of mRNA processing               | 10        | 3           | 0.75000  | 0.03340        |
| GO:0002064 | epithelial cell development                          | 17        | 4           | 1.27000  | 0.03350        |
| GO:0032092 | positive regulation of protein binding               | 17        | 4           | 1.27000  | 0.03350        |
| GO:0060271 | cilium morphogenesis                                 | 92        | 12          | 6.87000  | 0.03990        |
| GO:0070192 | chromosome organization involved in meiosis          | 18        | 4           | 1.34000  | 0.04060        |
| GO:0045732 | positive regulation of protein catabolic process     | 35        | 6           | 2.61000  | 0.04270        |
| GO:0001736 | establishment of planar polarity                     | 61        | 8           | 4.56000  | 0.08210        |
